# Supplementary material for: Satellite-observed land cover change predicts plant genomic erosion over half a century
Source: Research Square preprint supplement (doi:10.21203/rs.3.rs-4132820/v1), 2024-04-23
Supplement: Supplementary file 1 [file 62e91c1d63716bfdee31c62c.docx]

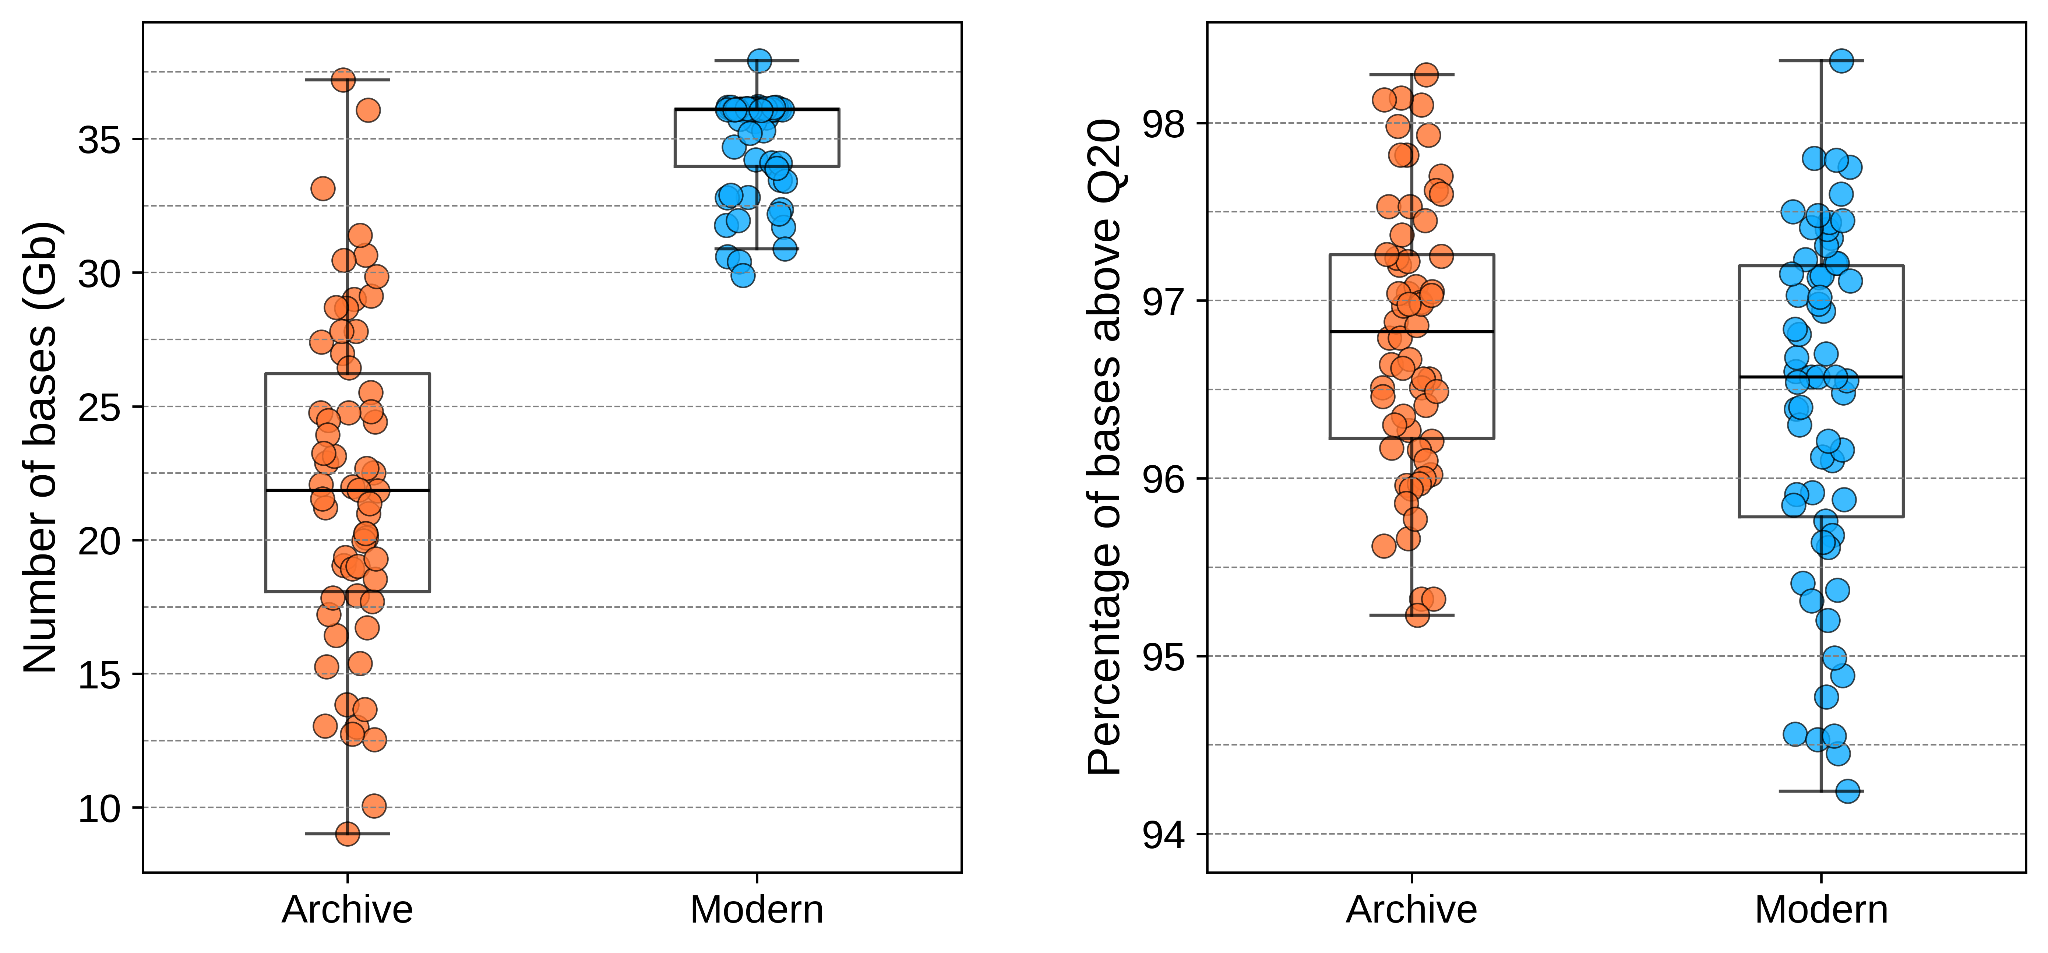
 Supplementary fig. 1. Number of bases across herbarium archives and modern samples. The number of bases per individual and the percentage of high-quality bases (Q>20) after the removal of sequencing adapters and of low-quality reads.


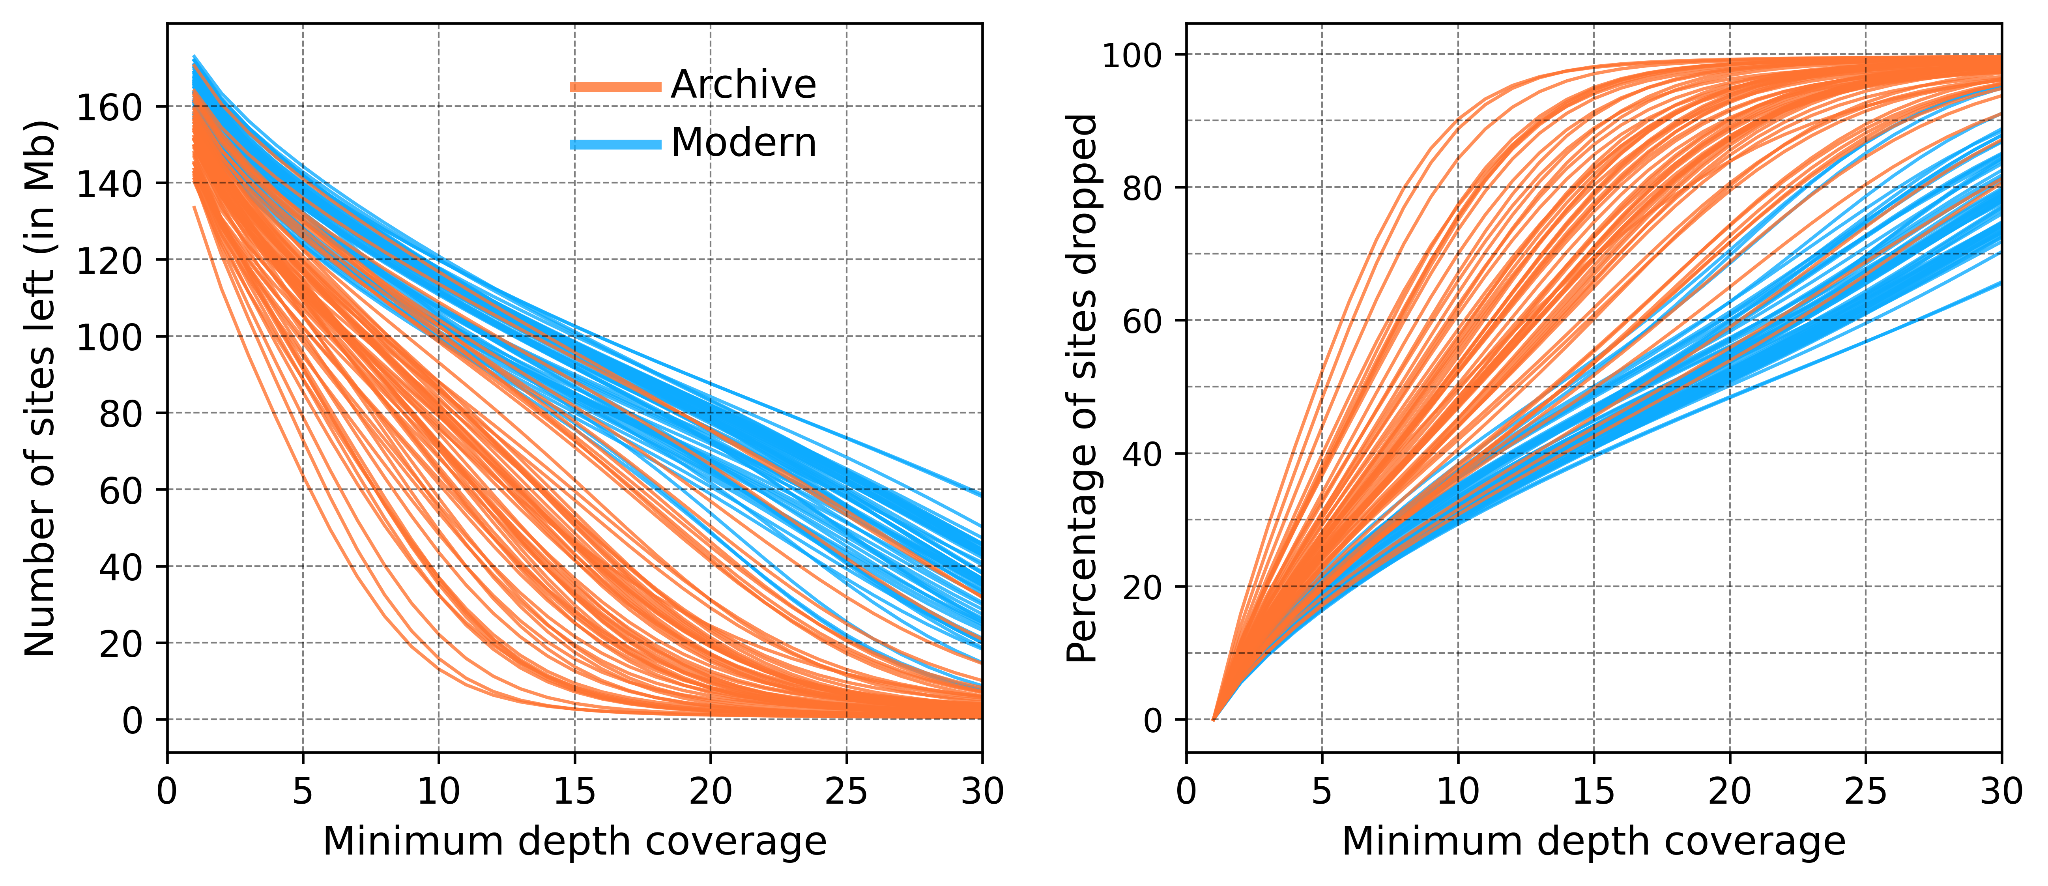
 Supplementary fig. 2. Effects of minimum depth-coverage on the amount of data.

The number of high-quality sites remaining and the percentage of high-quality sites dropped after removal of sites below a minimum depth-coverage.


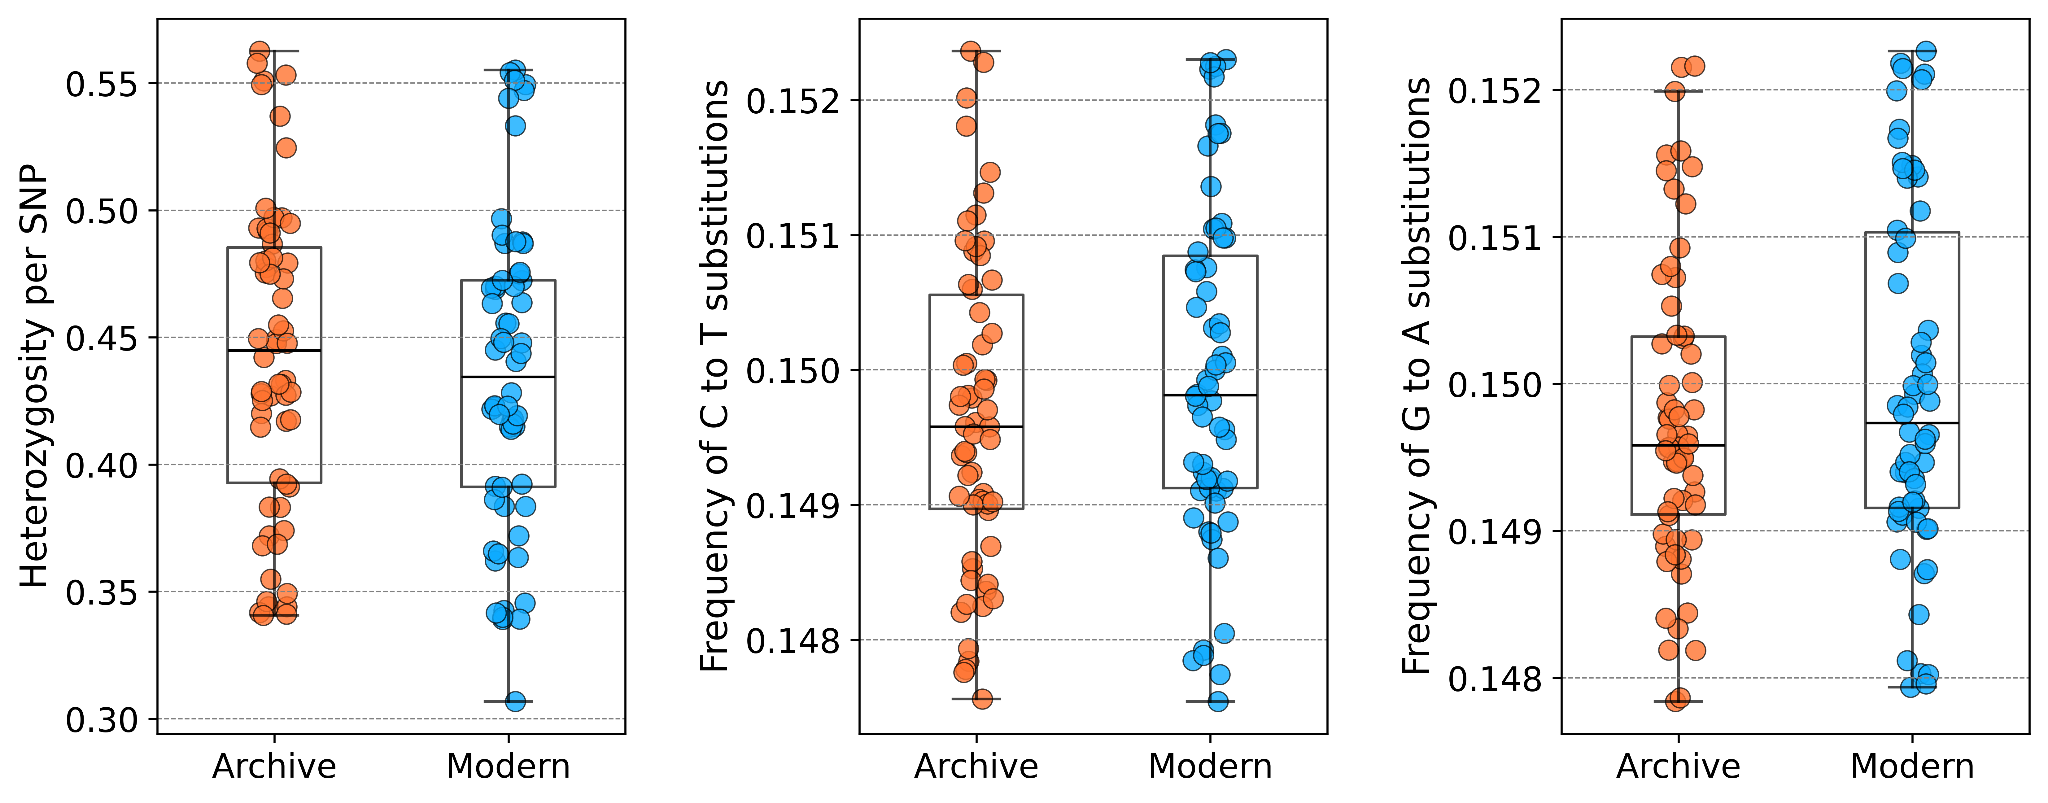


Supplementary fig. 3. Heterozygosity rate and frequency of substitutions across individuals.

The heterozygosity rate is calculated by dividing the heterozygous sites by the total number of quality-filtered SNPs for each individual. The frequency of C to T and G to A substitutions is calculated by dividing the number of the respective substitution by the total number of quality-filtered SNPs for each individual.


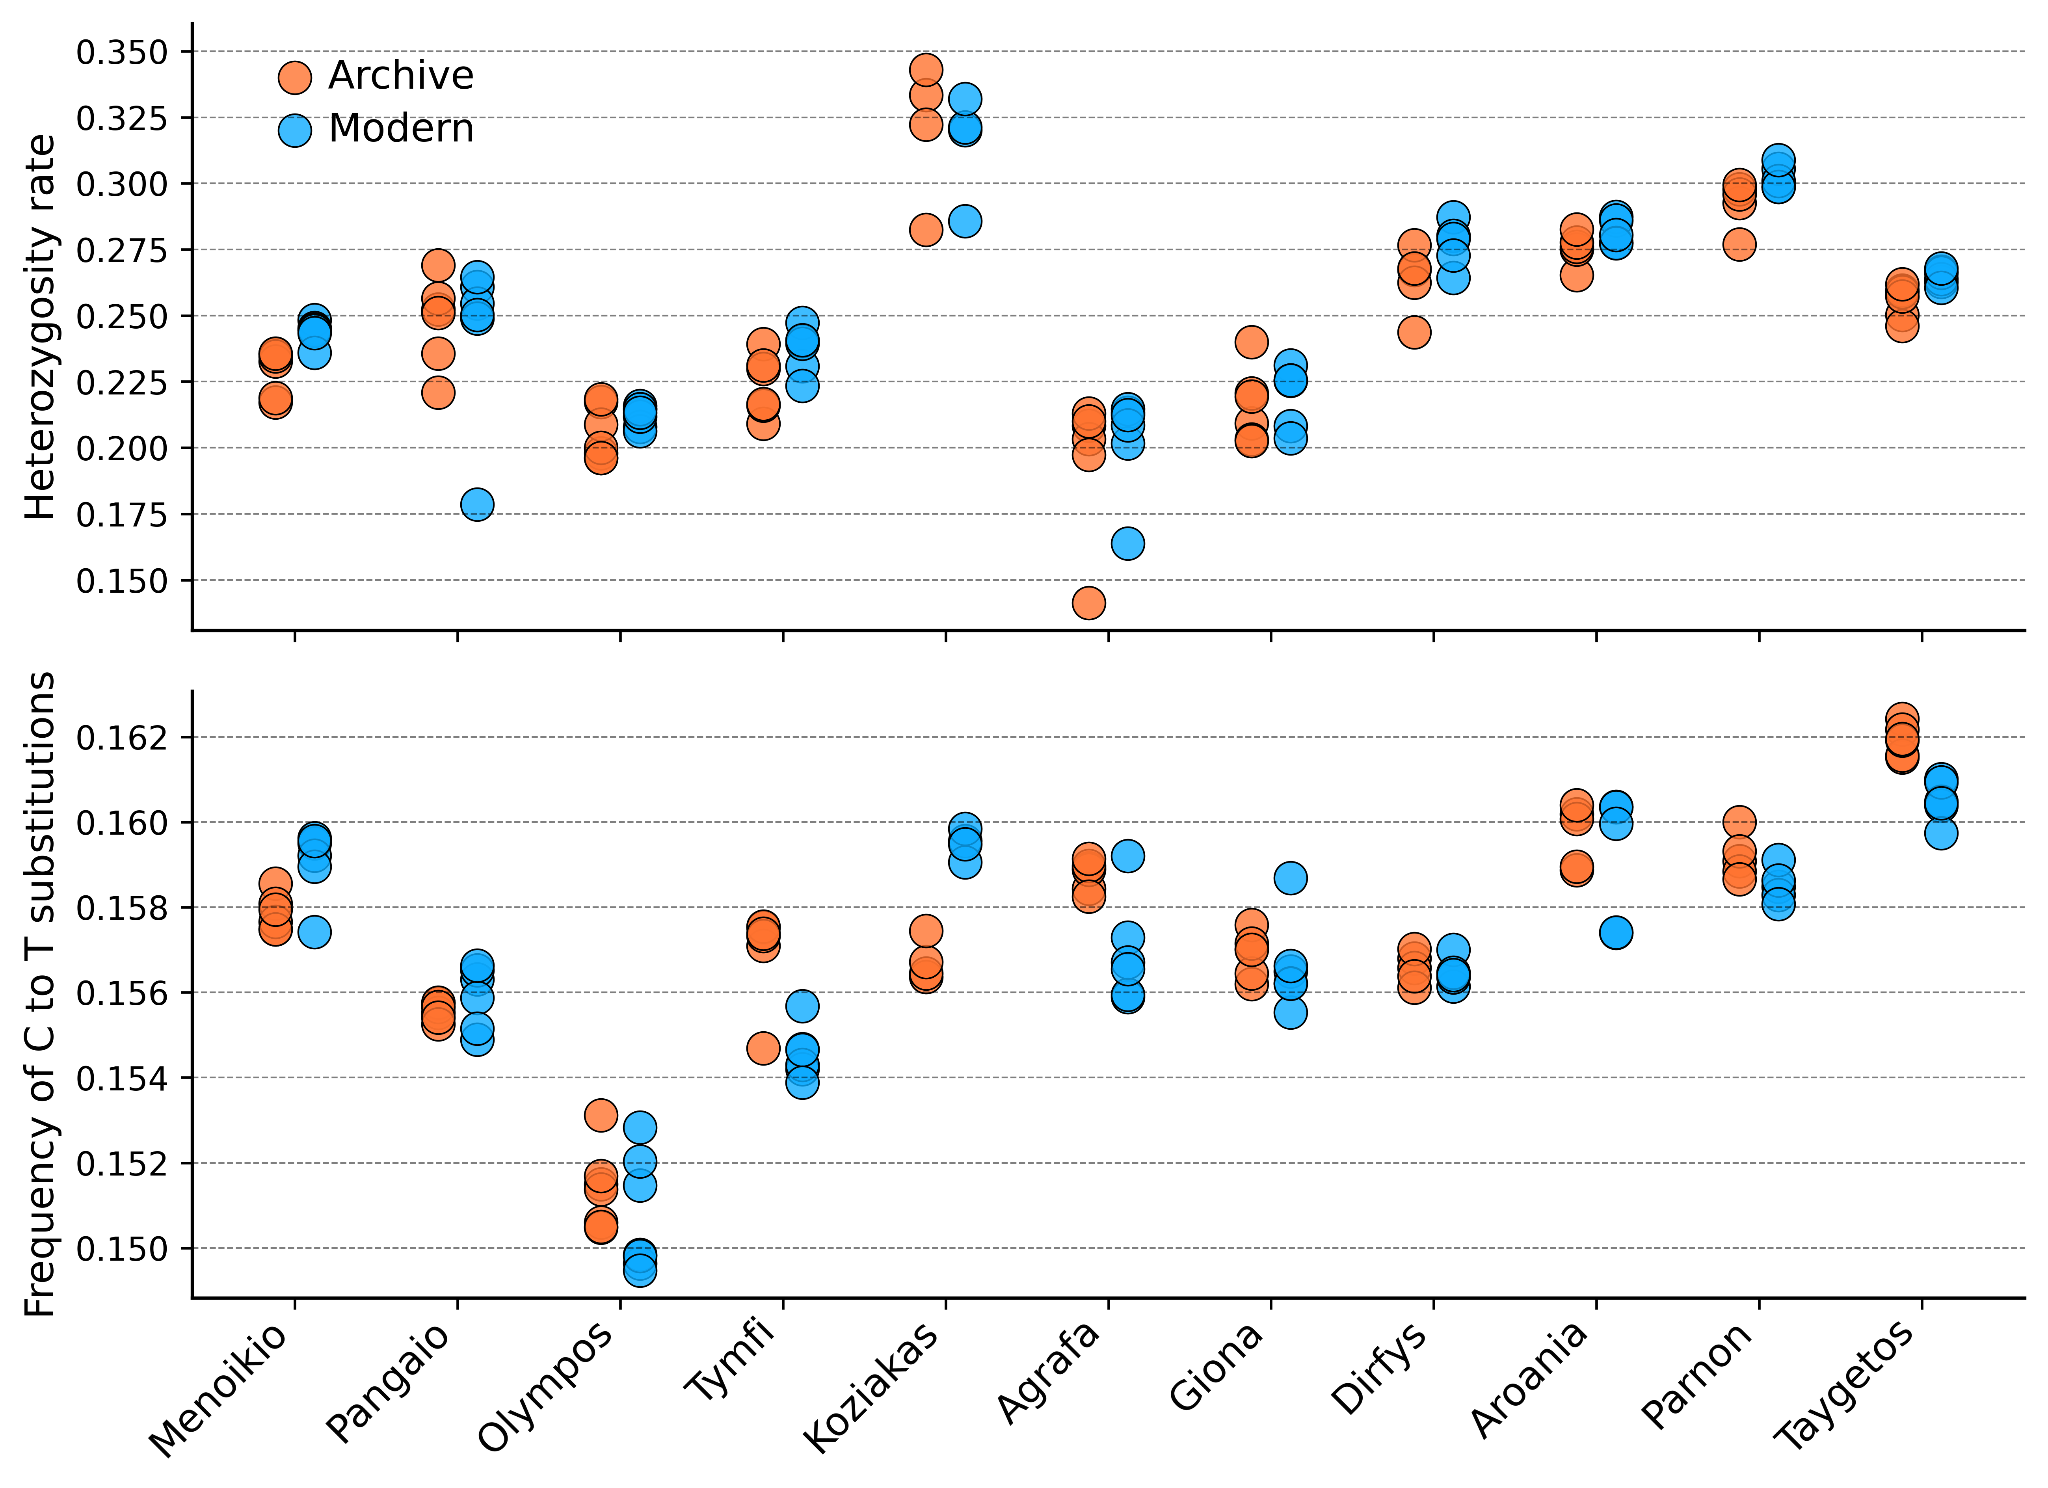
 Supplementary fig. 4. Heterozygosity rate and frequency of C to T substitutions across individuals and populations.

For each population a maximum of 10% missing genotypes per site was allowed. Heterozygosity rate is calculated by dividing the number of heterozygous sites by the total number of called sites for each individual. The frequency of C to T substitutions is calculated by dividing the number of C to T substitutions by the total number of substitutions for each individual.


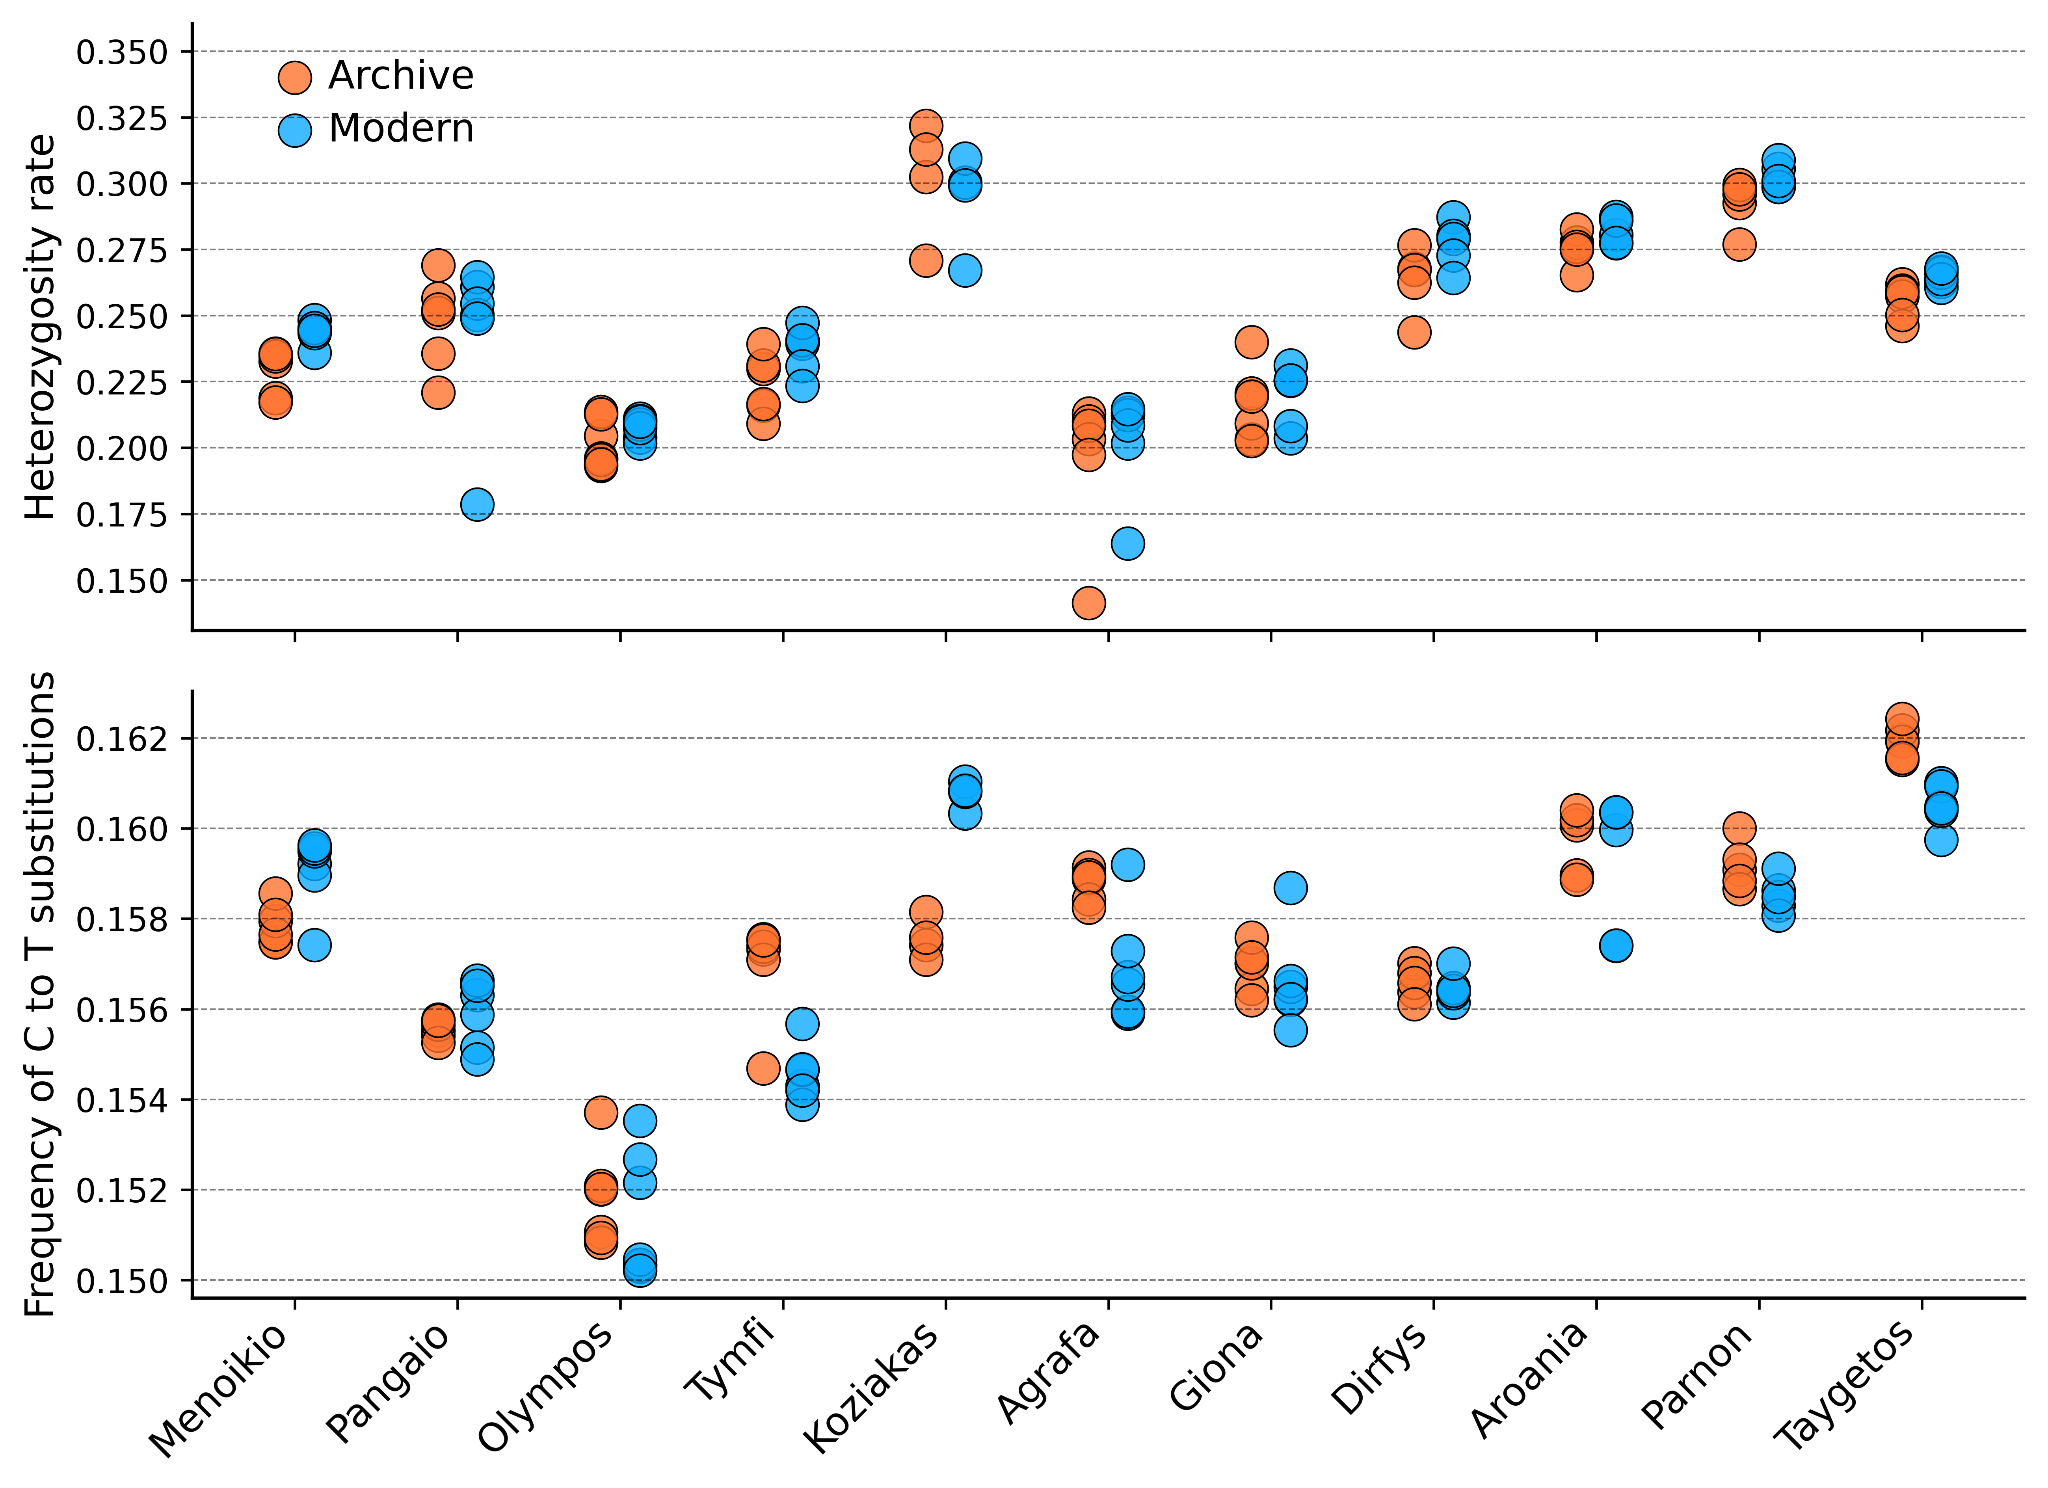
 Supplementary fig. 5. Heterozygosity rate and frequency of C to T substitutions across individuals and populations.

For each population a maximum of 15% missing genotypes per site was allowed. Heterozygosity rate is calculated by dividing the number of heterozygous sites by the total number of called sites for each individual. The frequency of C to T substitutions is calculated by dividing the number of C to T substitutions by the total number of substitutions for each individual.


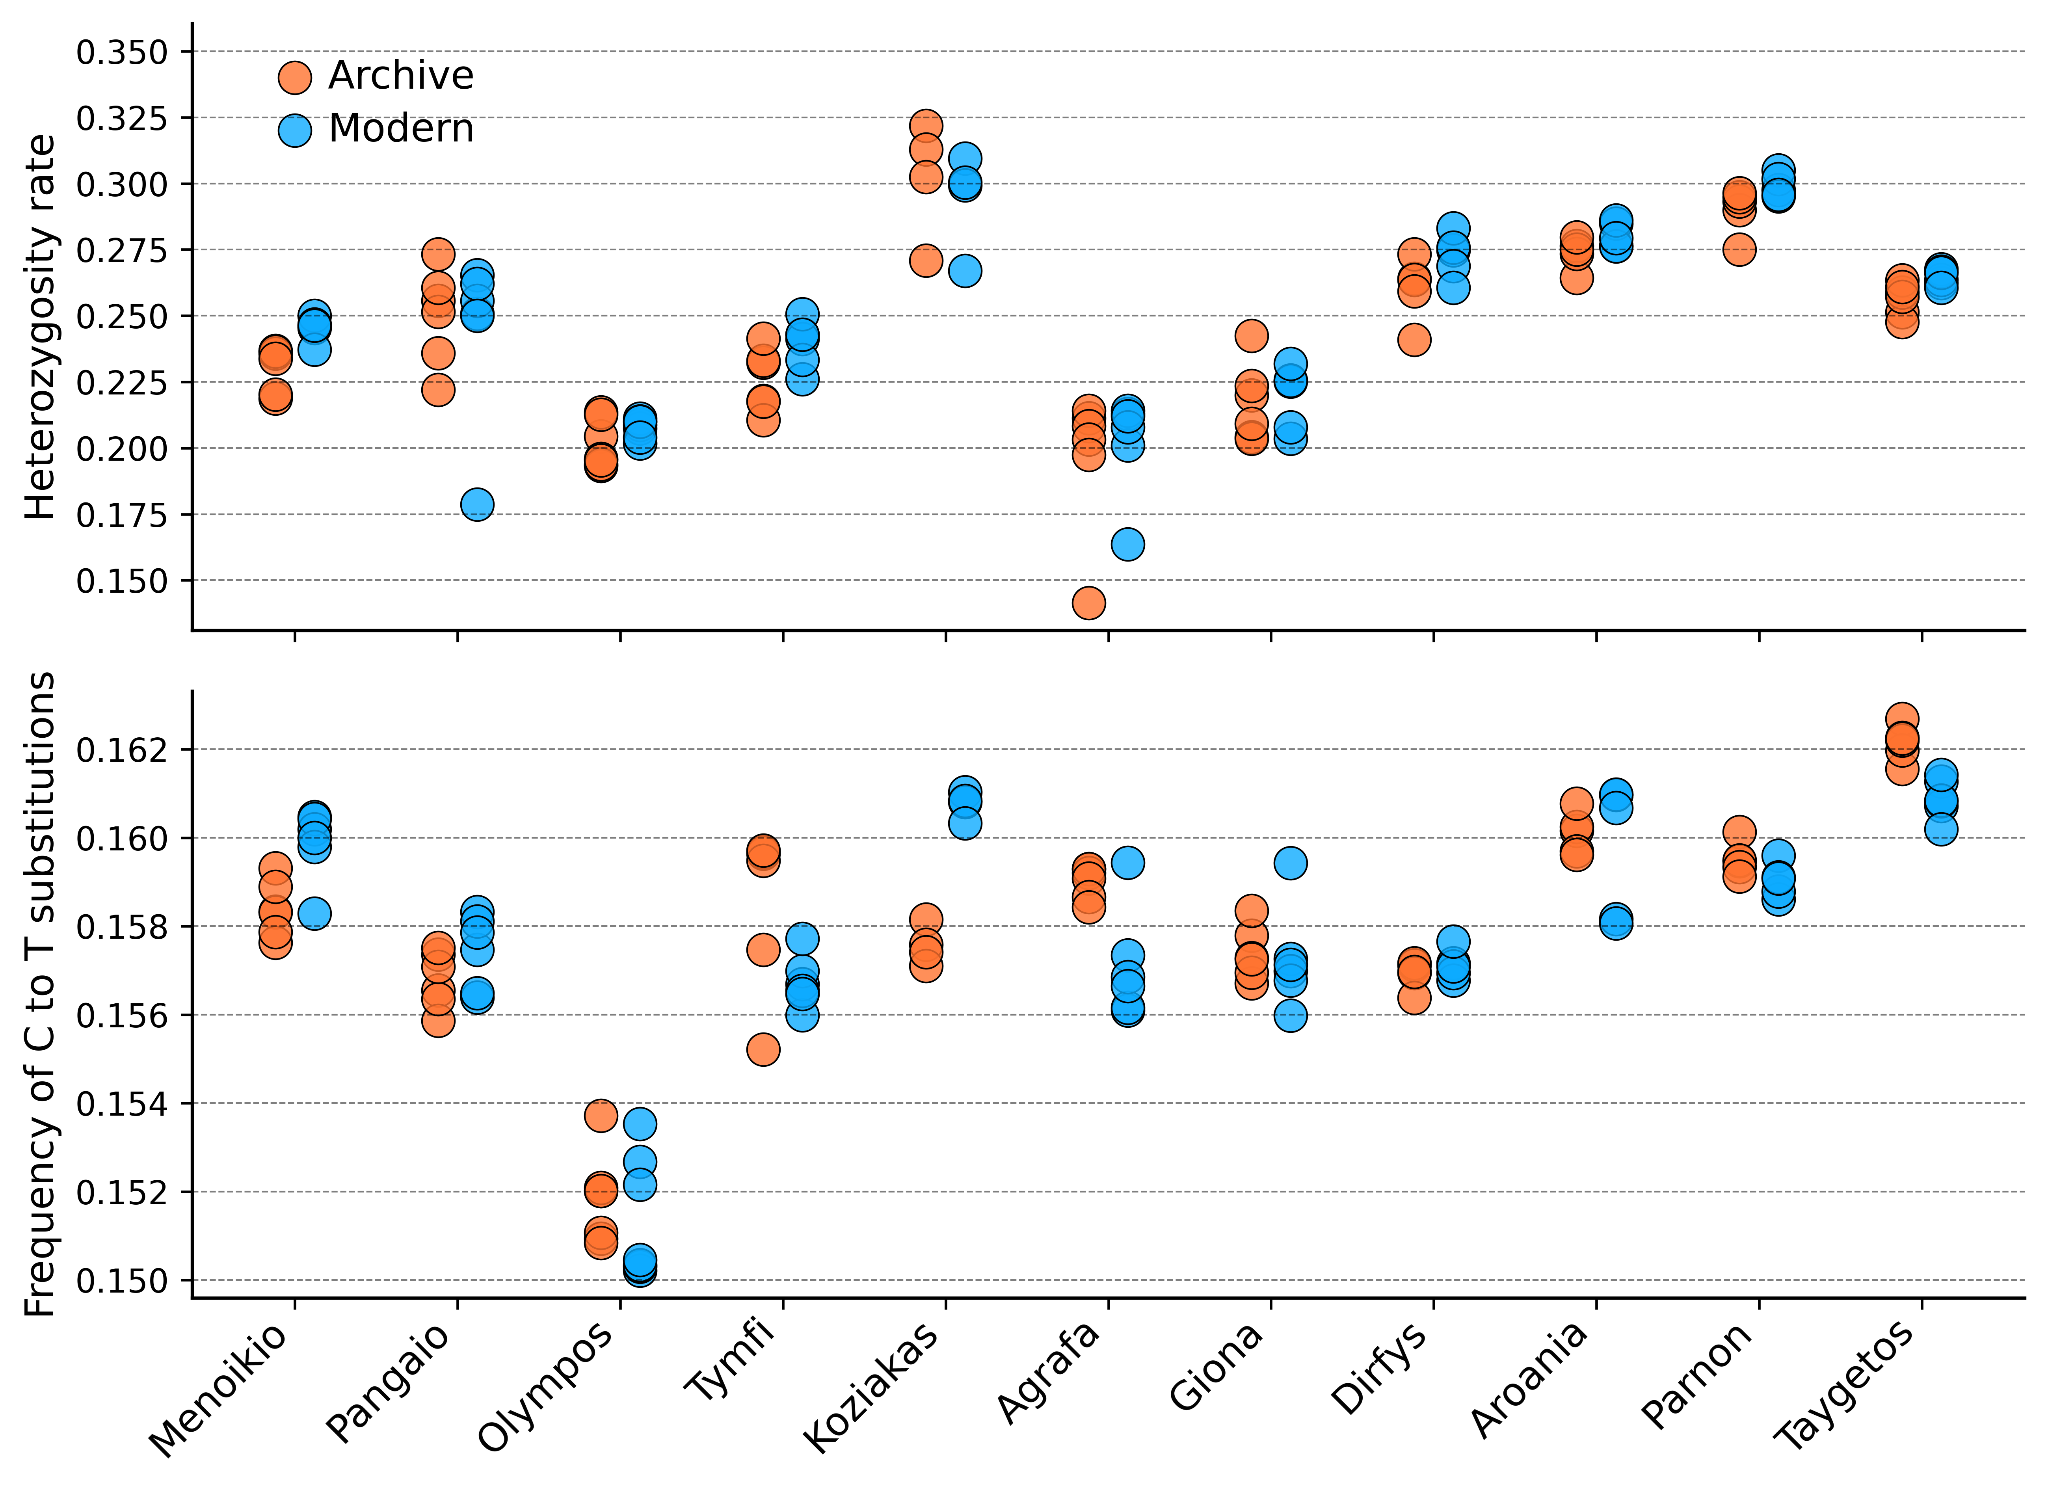
 Supplementary fig. S6. Heterozygosity rate and frequency of C to T substitutions across individuals and populations.

For each population a maximum of 20% missing genotypes per site was allowed. Heterozygosity rate is calculated by dividing the number of heterozygous sites by the total number of called sites for each individual. The frequency of C to T substitutions is calculated by dividing the number of C to T substitutions by the total number of substitutions for each individual.


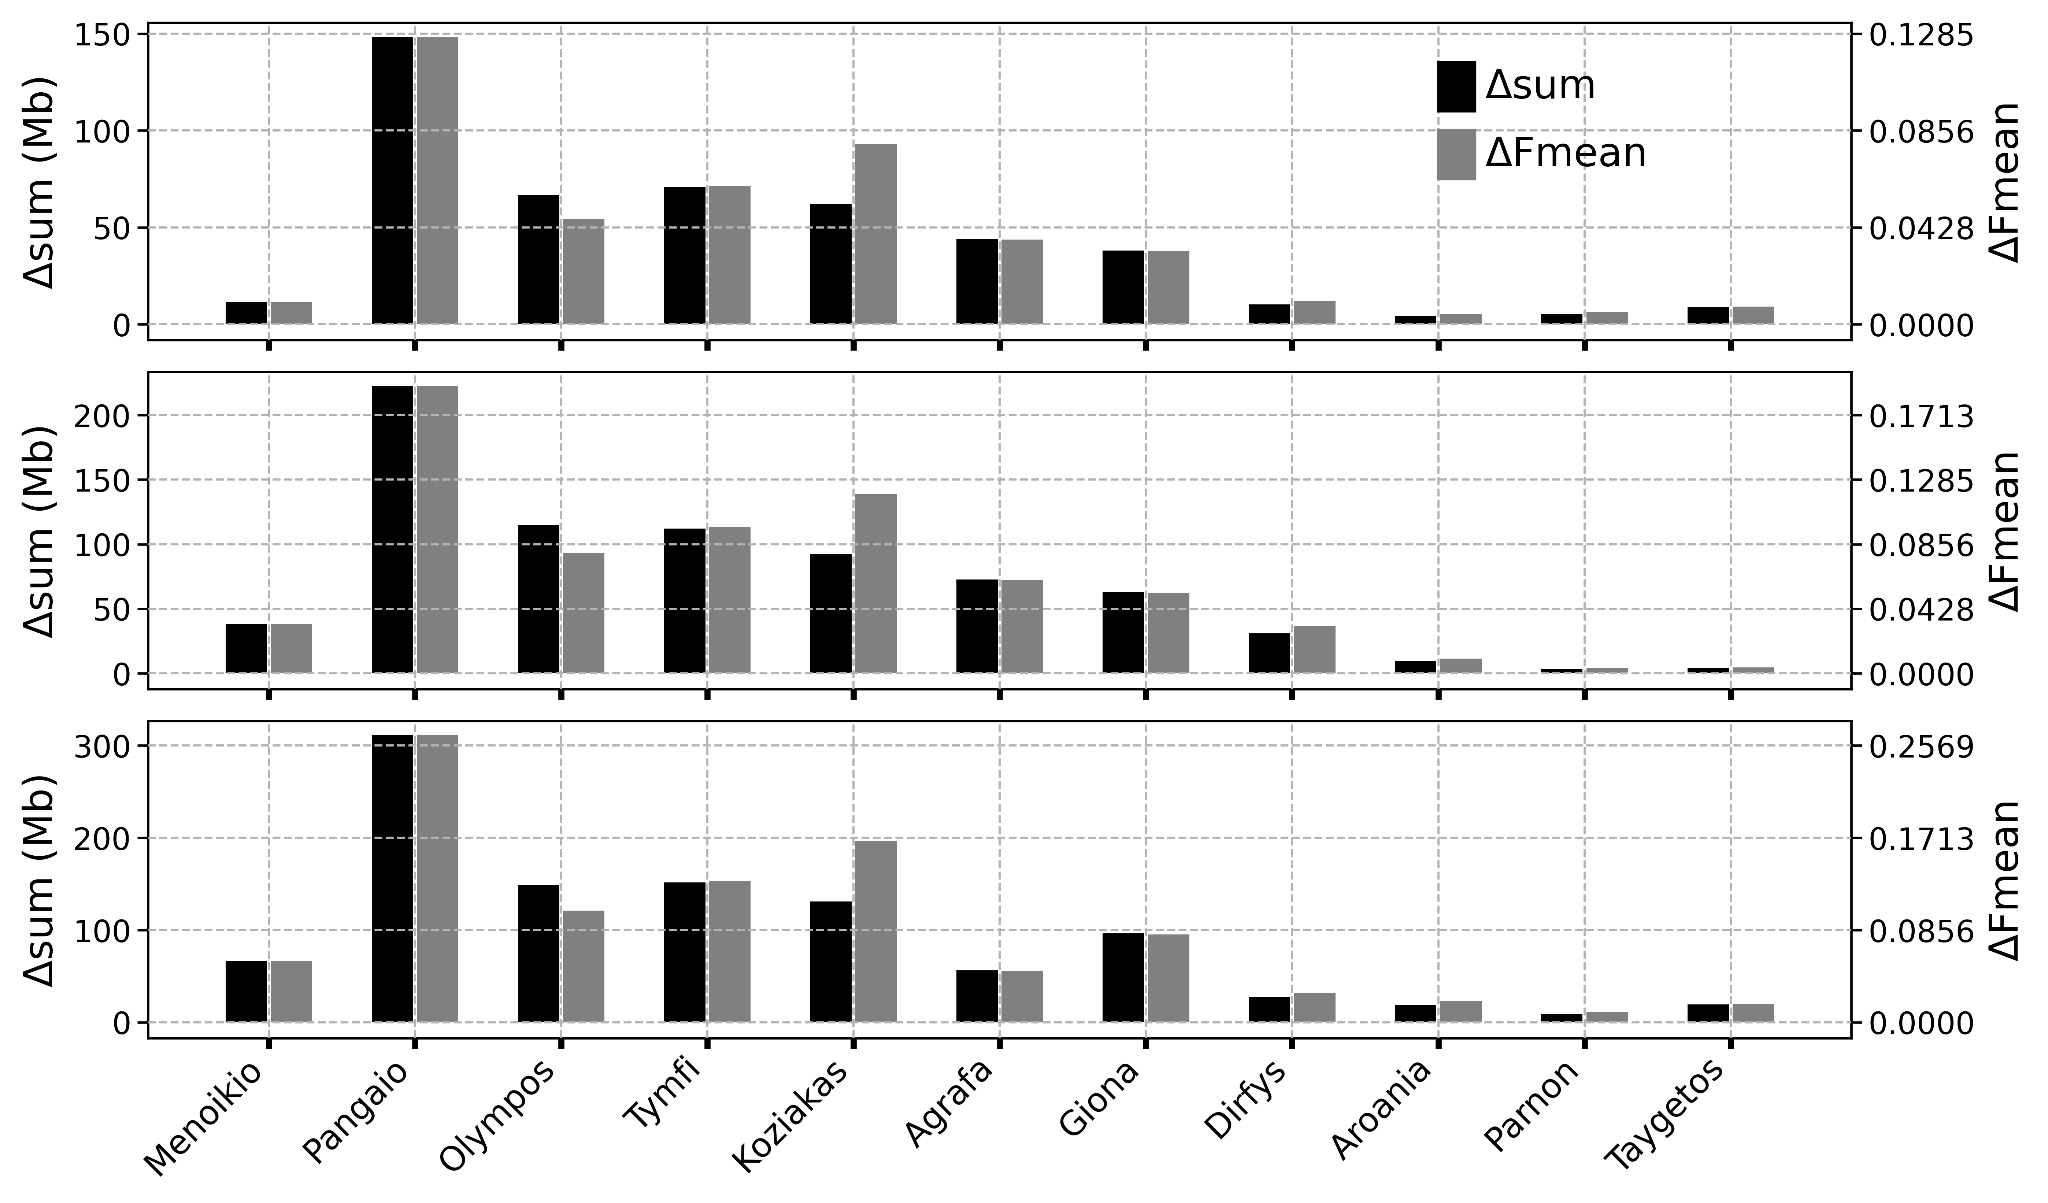
 Supplementary fig. S7. Delta estimators of temporal genomic change for a minimum ROH length of 500 kb.

From top to bottom row the maximum allowed number of heterozygous sites for ROH calculations was set to one, two, and three respectively.


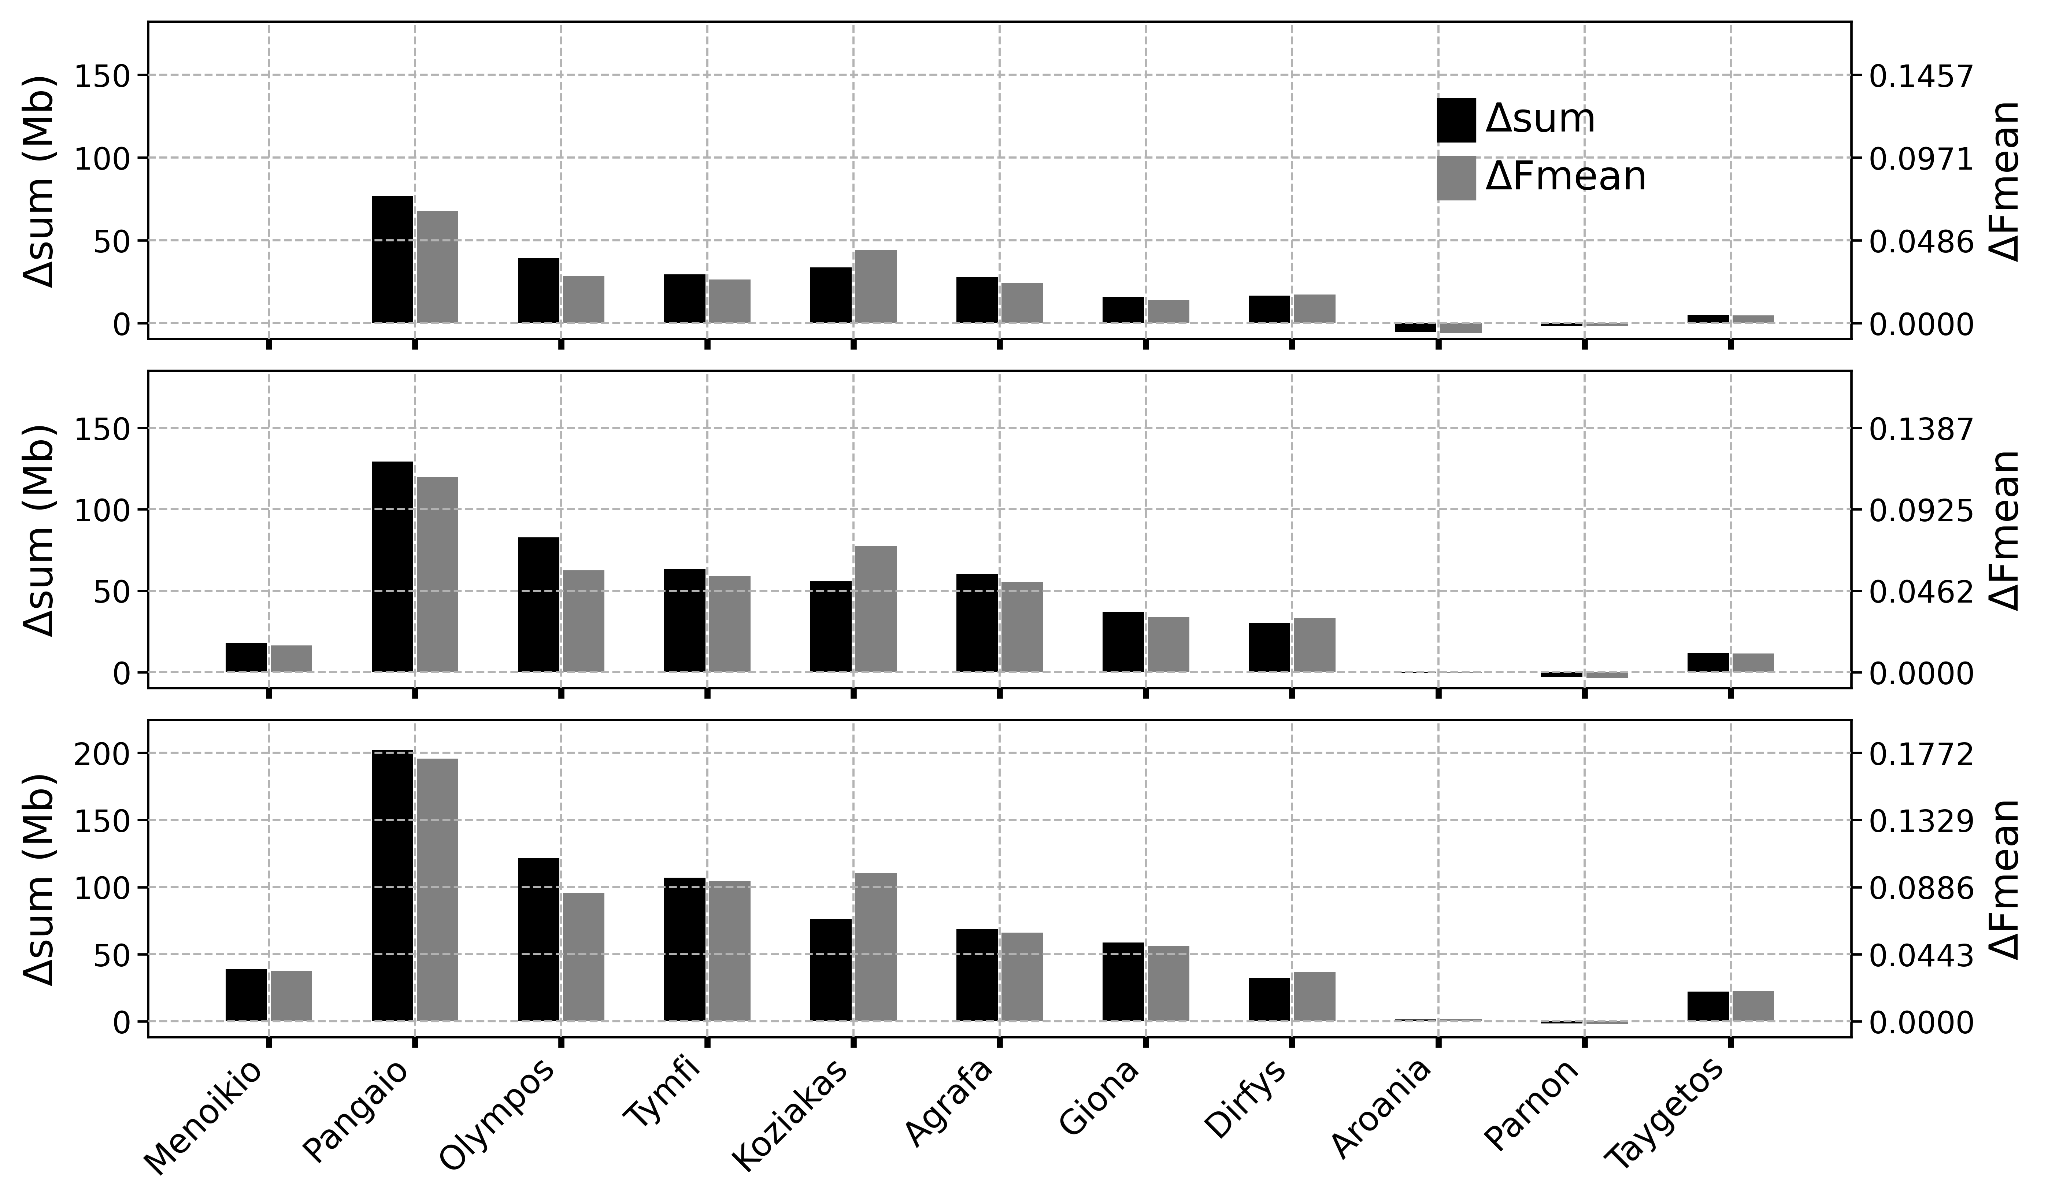
 Supplementary fig. 8. Delta estimators of temporal genomic change for a minimum ROH length of 700 kb.

From top to bottom row the maximum allowed number of heterozygous sites for ROH calculations was set to one, two, and three respectively.


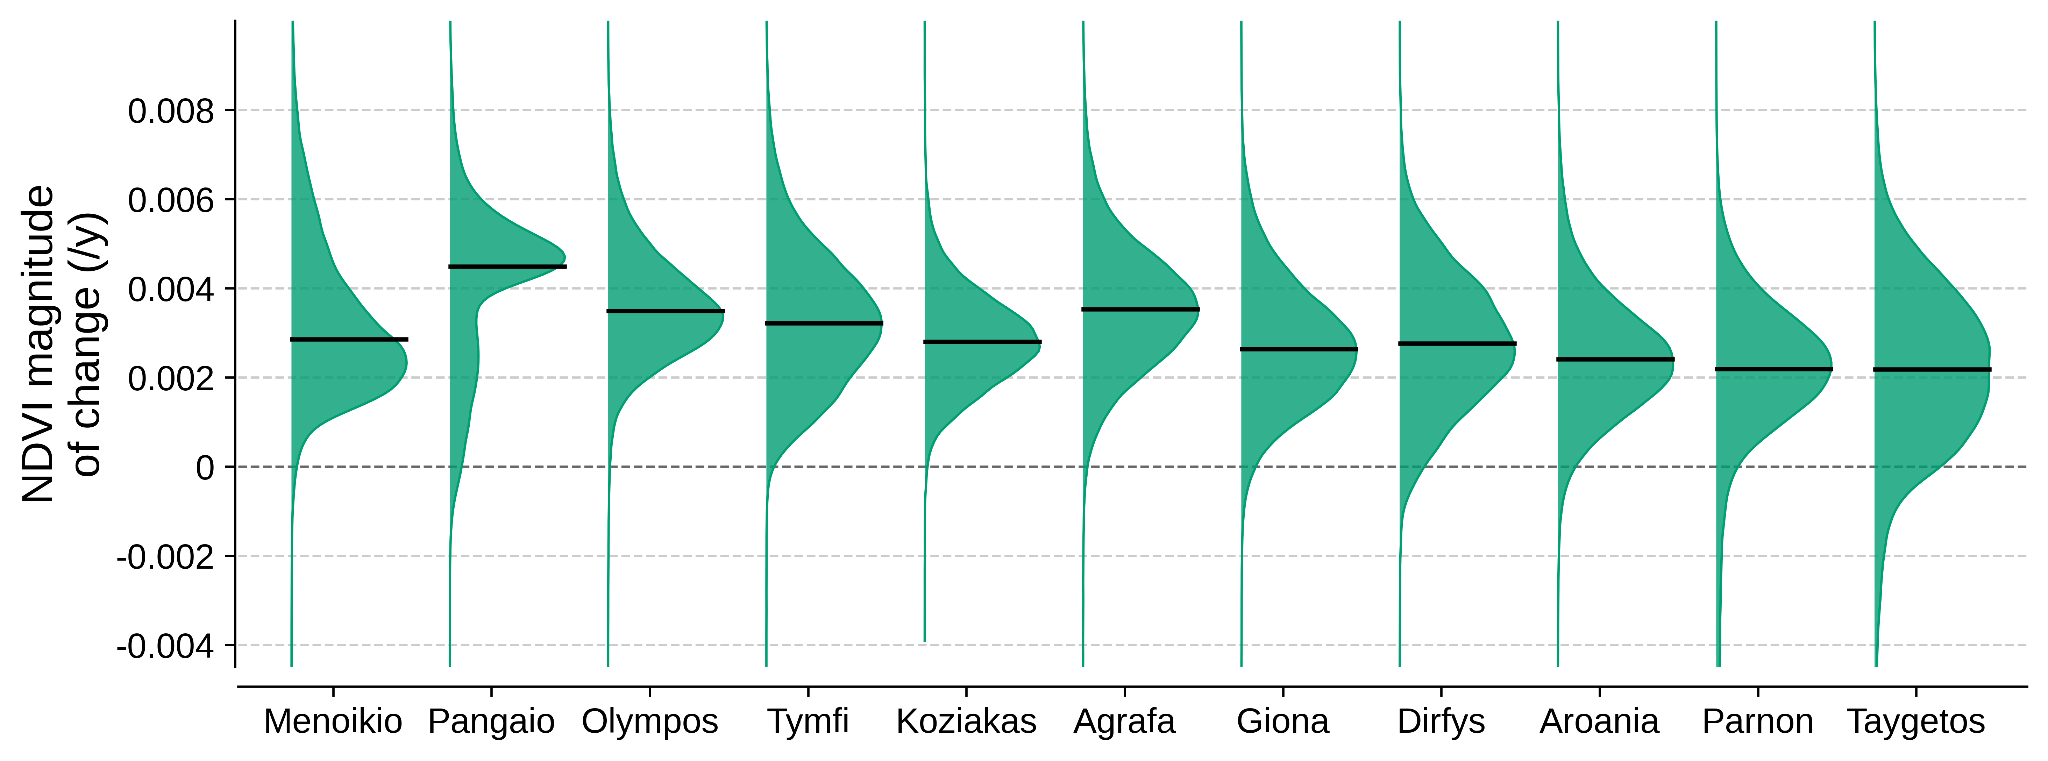
 Supplementary fig. 9. The distribution of NDVI magnitudes of change across mountains.

The distributions include values of 30m pixels (grid cells) within the elevation belt that encompasses the montane and subalpine habitats of ironwort in each mountain. Black solid lines indicate the median values.


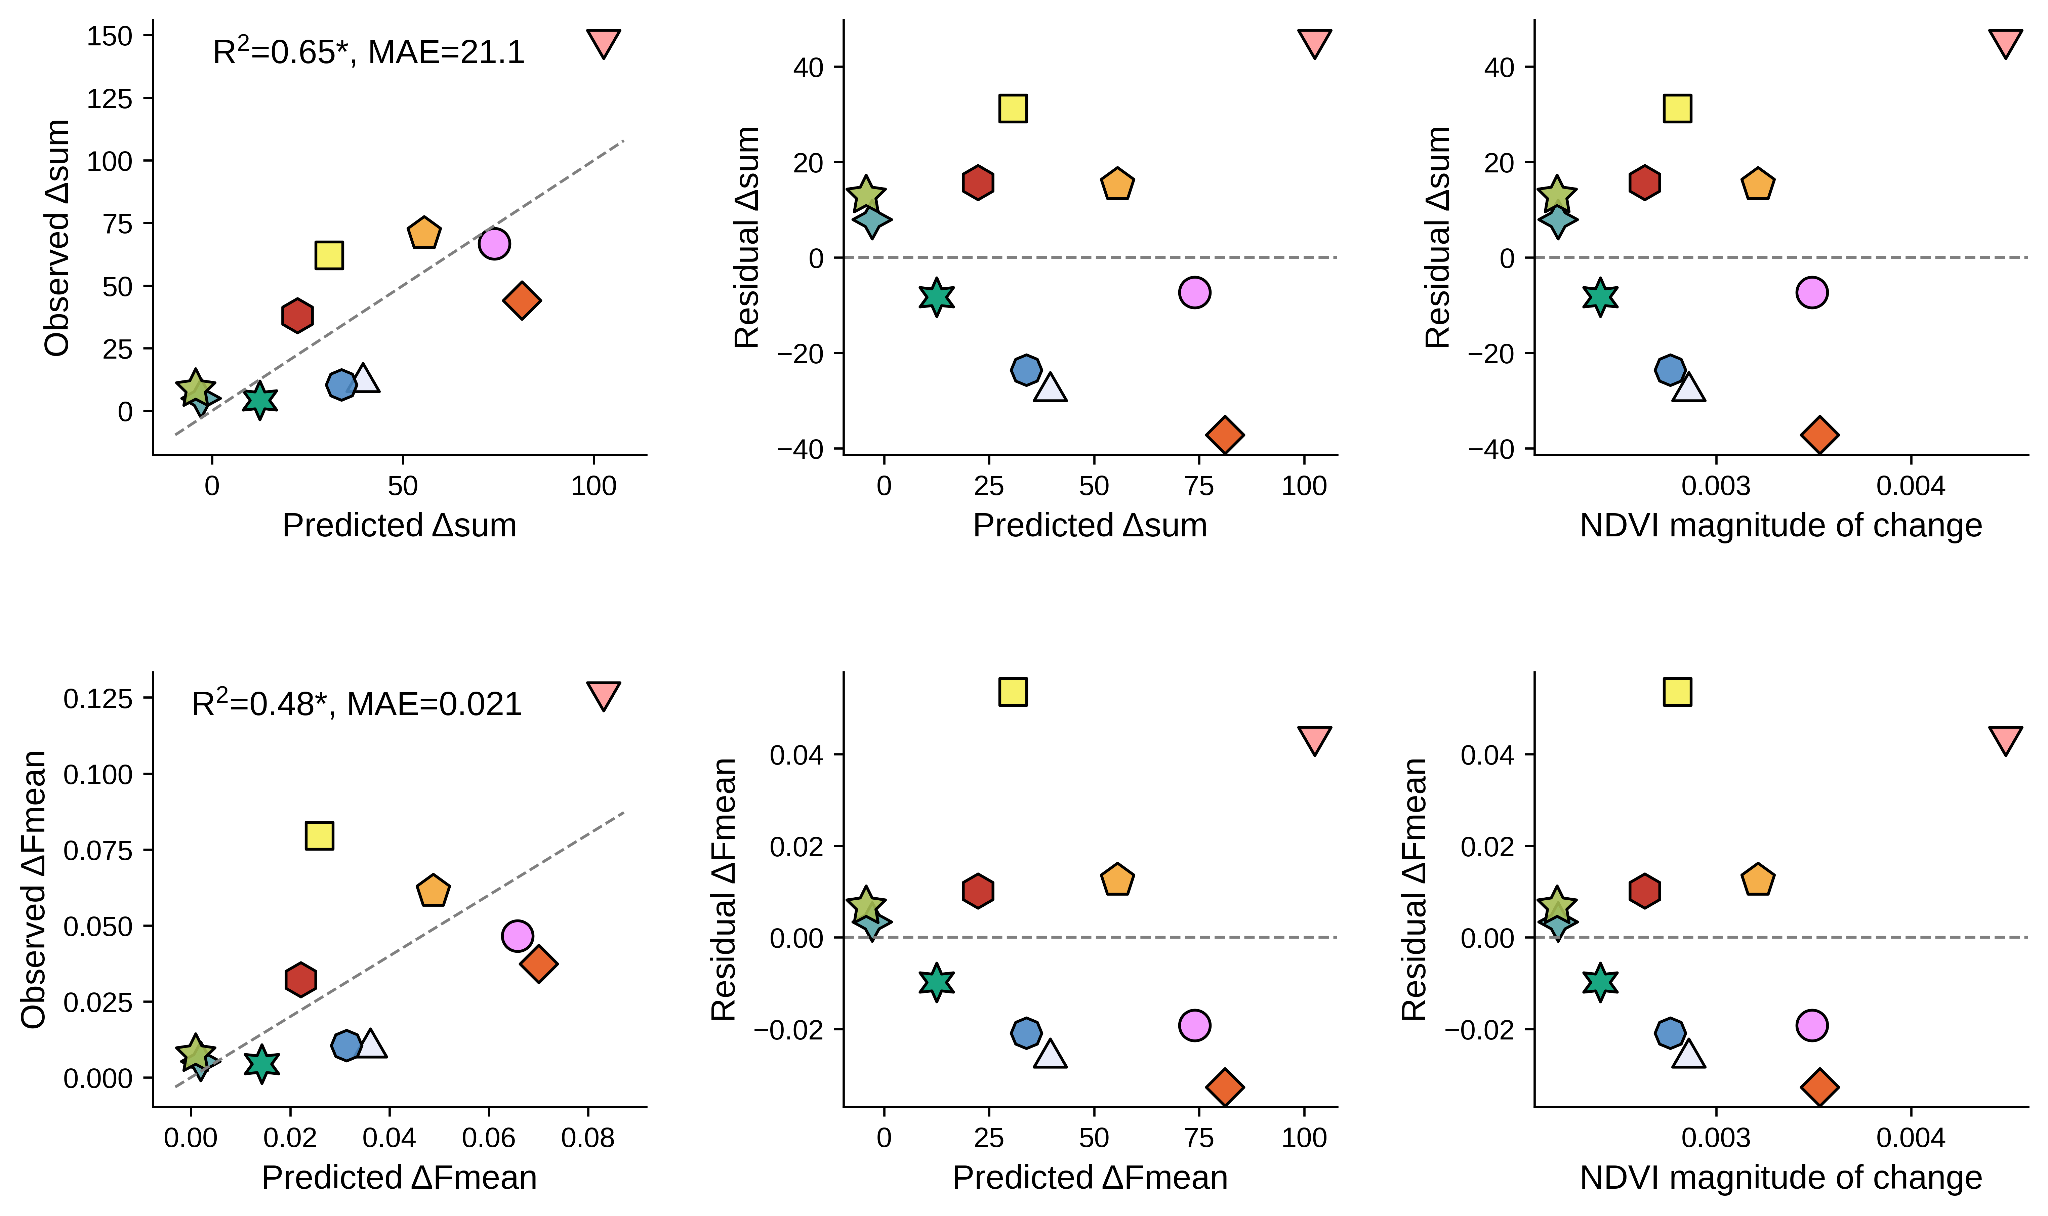
 Supplementary fig. 10. Predictions of genomic erosion.

Linear regressions between predicted and observed accumulation of ROHs, and the distribution of residuals with regard to predicted values and NDVI magnitude of change (the predictor). Predictions for each population were generated using the jackknife procedure. A threshold of maximum one allowed heterozygous site per ROH was used and a minimum ROH length of 500 kb was considered. The top row shows the predictions for Δsum while the bottom row for ΔFmean. The asterisk after the R squared value indicates p<0.05. MAE=Mean Absolute Error.


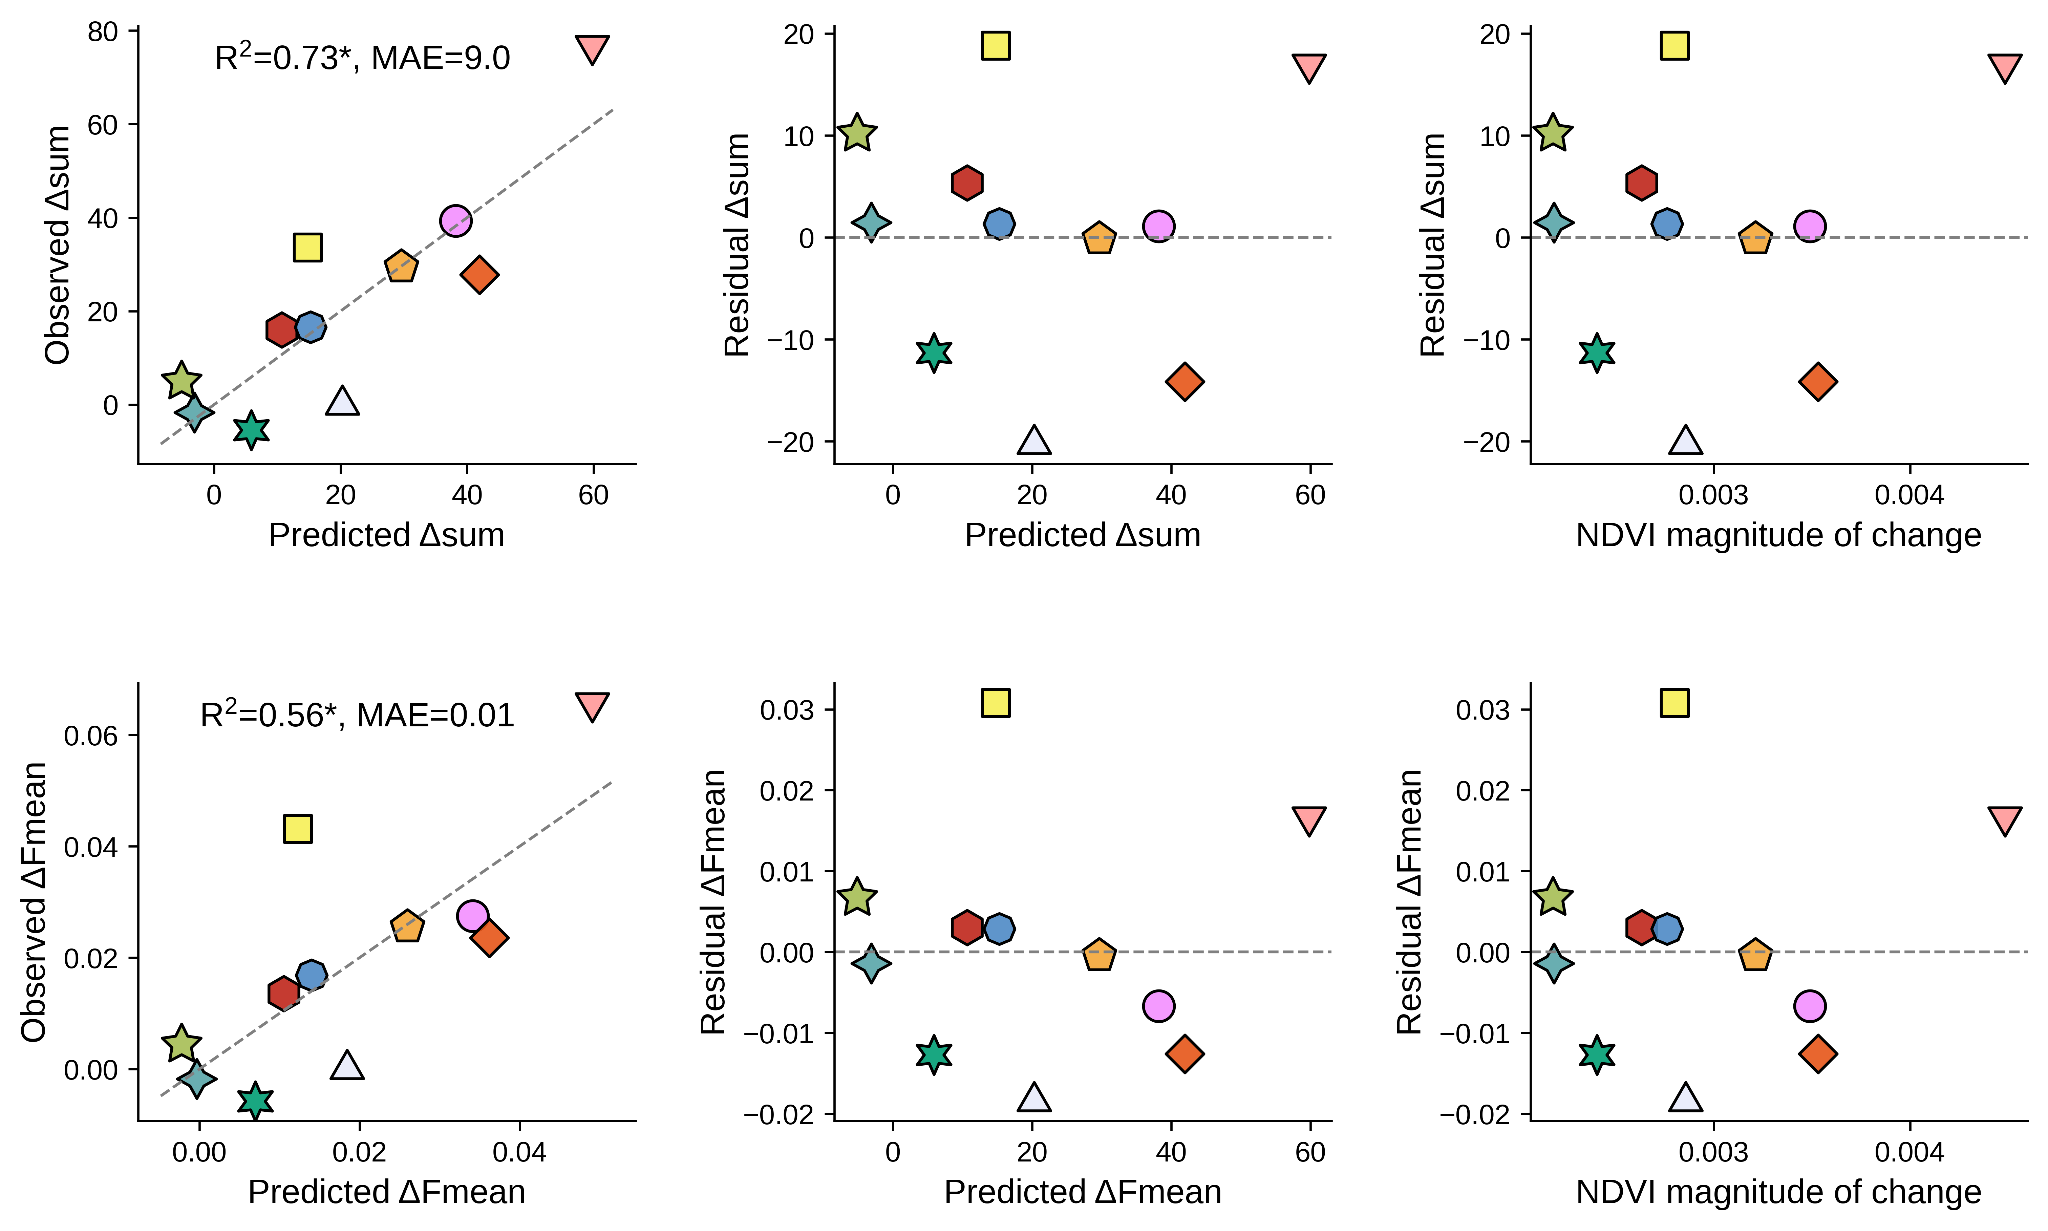
 Supplementary fig. 11. Predictions of genomic erosion.

Linear regressions between predicted and observed accumulation of ROHs, and the distribution of residuals with regard to predicted values and NDVI magnitude of change (the predictor). Predictions for each population were generated using the jackknife procedure. A threshold of maximum one allowed heterozygous site per ROH was used and a minimum ROH length of 700 kb was considered. The top row shows the predictions for Δsum while the bottom row for ΔFmean. The asterisk after the R squared value indicates p<0.05. MAE=Mean Absolute Error.


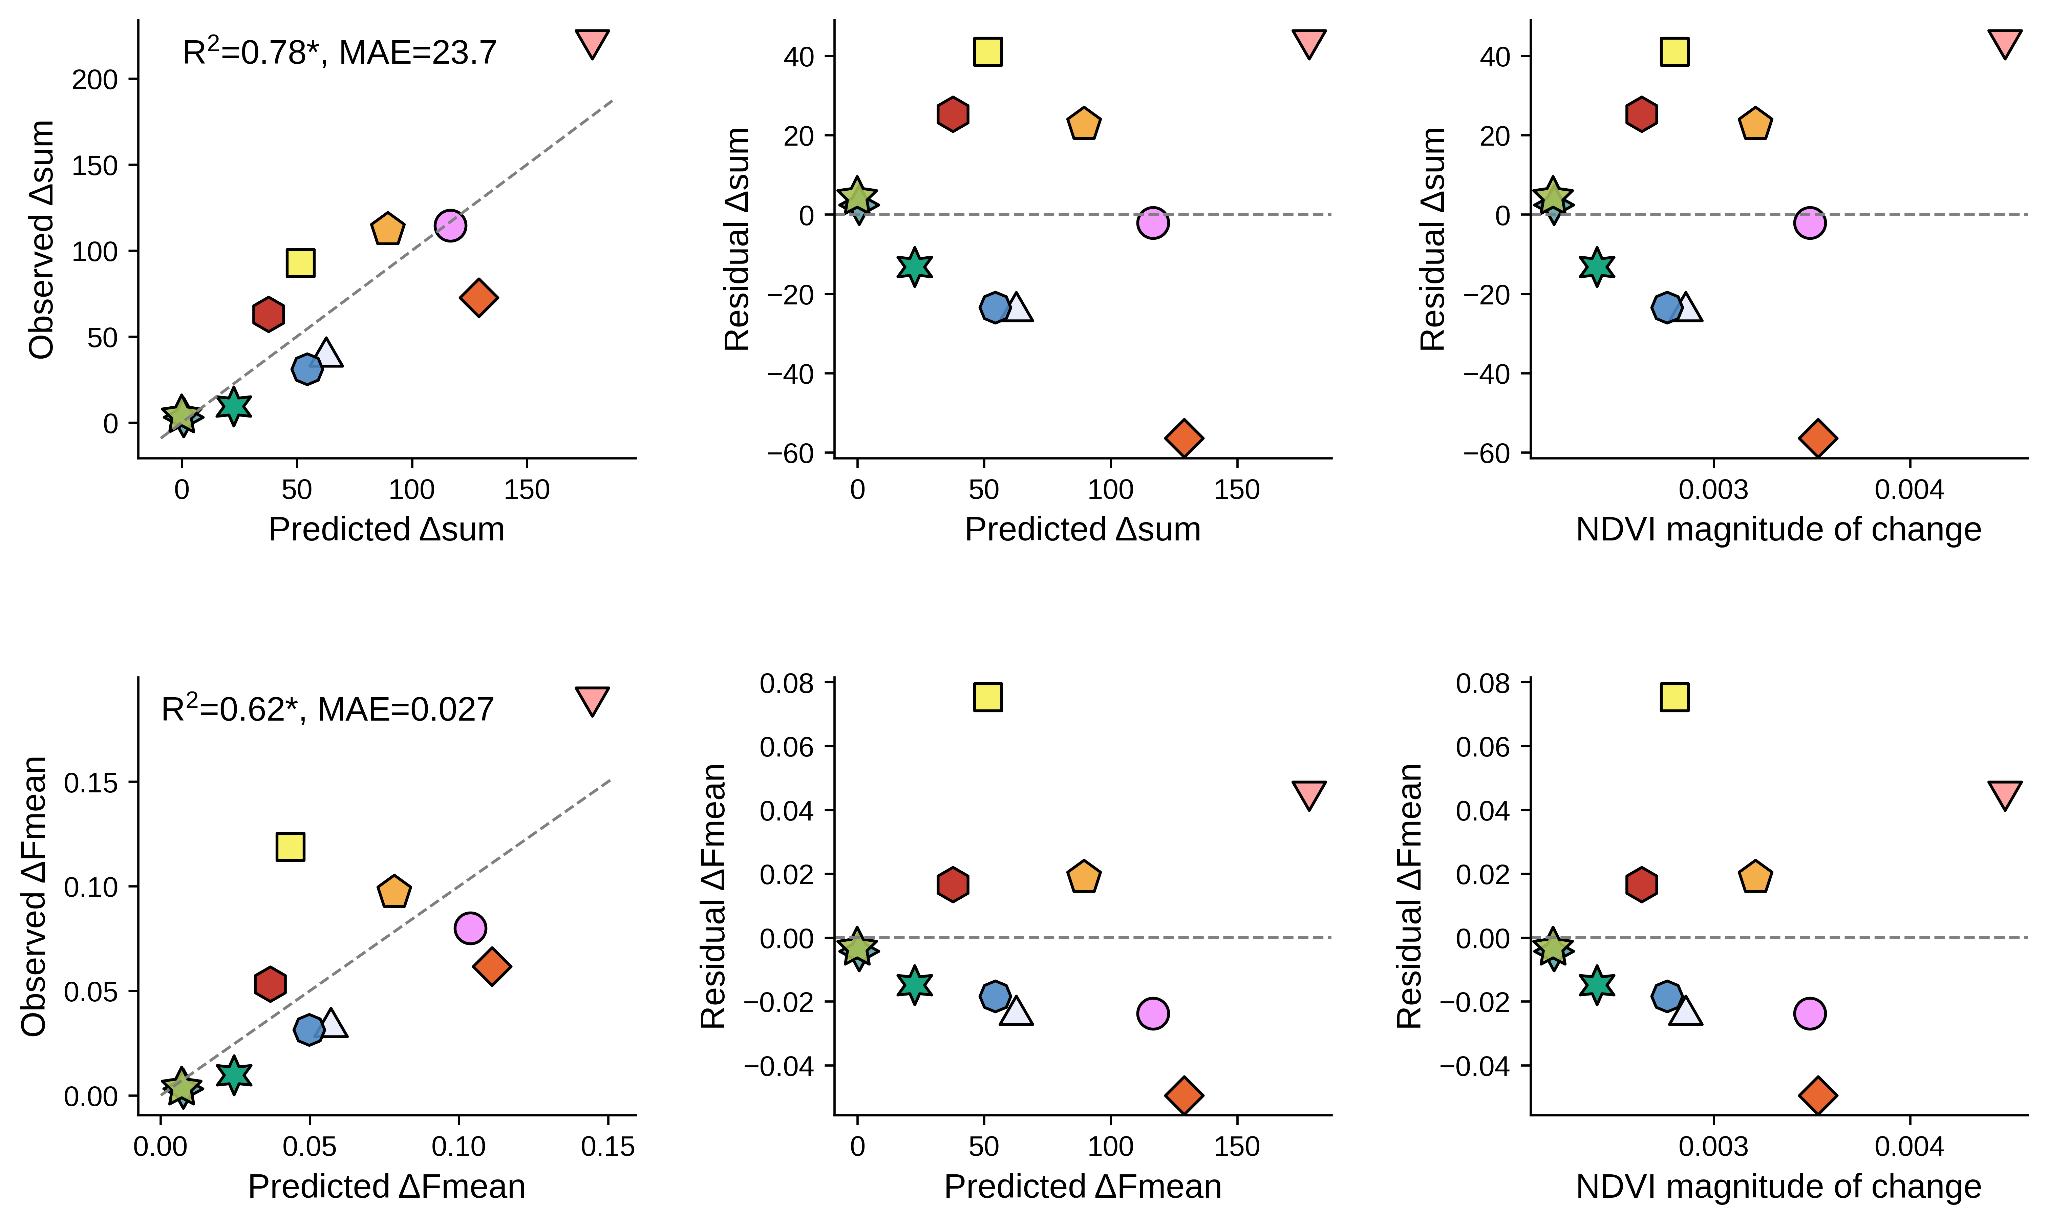
 Supplementary fig. 12. Predictions of genomic erosion.

Linear regressions between predicted and observed accumulation of ROHs, and the distribution of residuals with regard to predicted values and NDVI magnitude of change (the predictor). Predictions for each population were generated using the jackknife procedure. A threshold of maximum two allowed heterozygous sites per ROH was used and a minimum ROH length of 500 kb was considered. The top row shows the predictions for Δsum while the bottom row for ΔFmean. The asterisk after the R squared value indicates p<0.05. MAE=Mean Absolute Error.


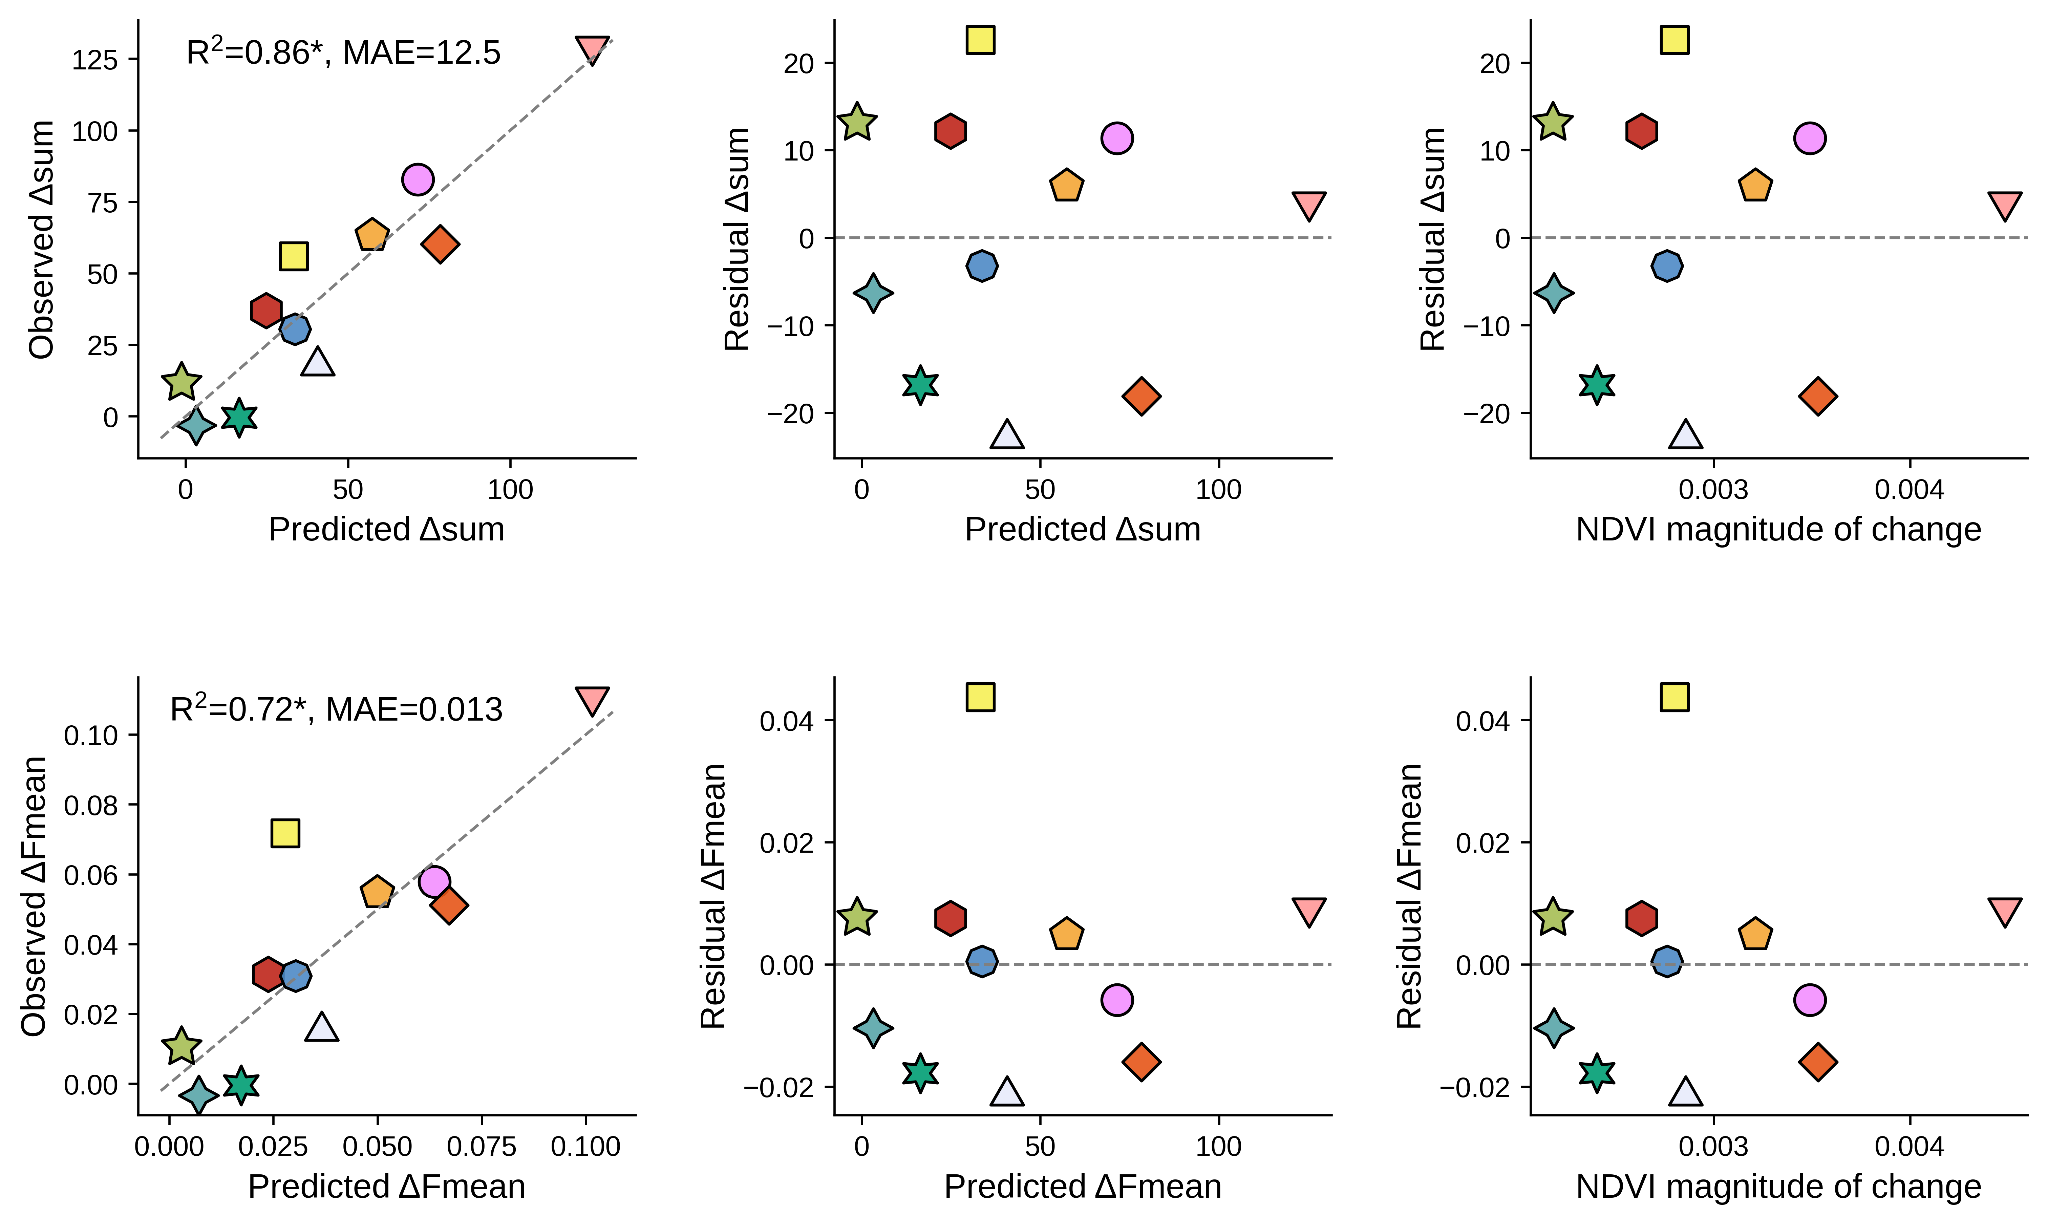
 Supplementary fig. 13. Predictions of genomic erosion.

Linear regressions between predicted and observed accumulation of ROHs, and the distribution of residuals with regard to predicted values and NDVI magnitude of change (the predictor). Predictions for each population were generated using the jackknife procedure. A threshold of maximum two allowed heterozygous sites per ROH was used and a minimum ROH length of 700 kb was considered. The top row shows the predictions for Δsum while the bottom row for ΔFmean. The asterisk after the R squared value indicates p<0.05. MAE=Mean Absolute Error. These estimates were used in the main text.


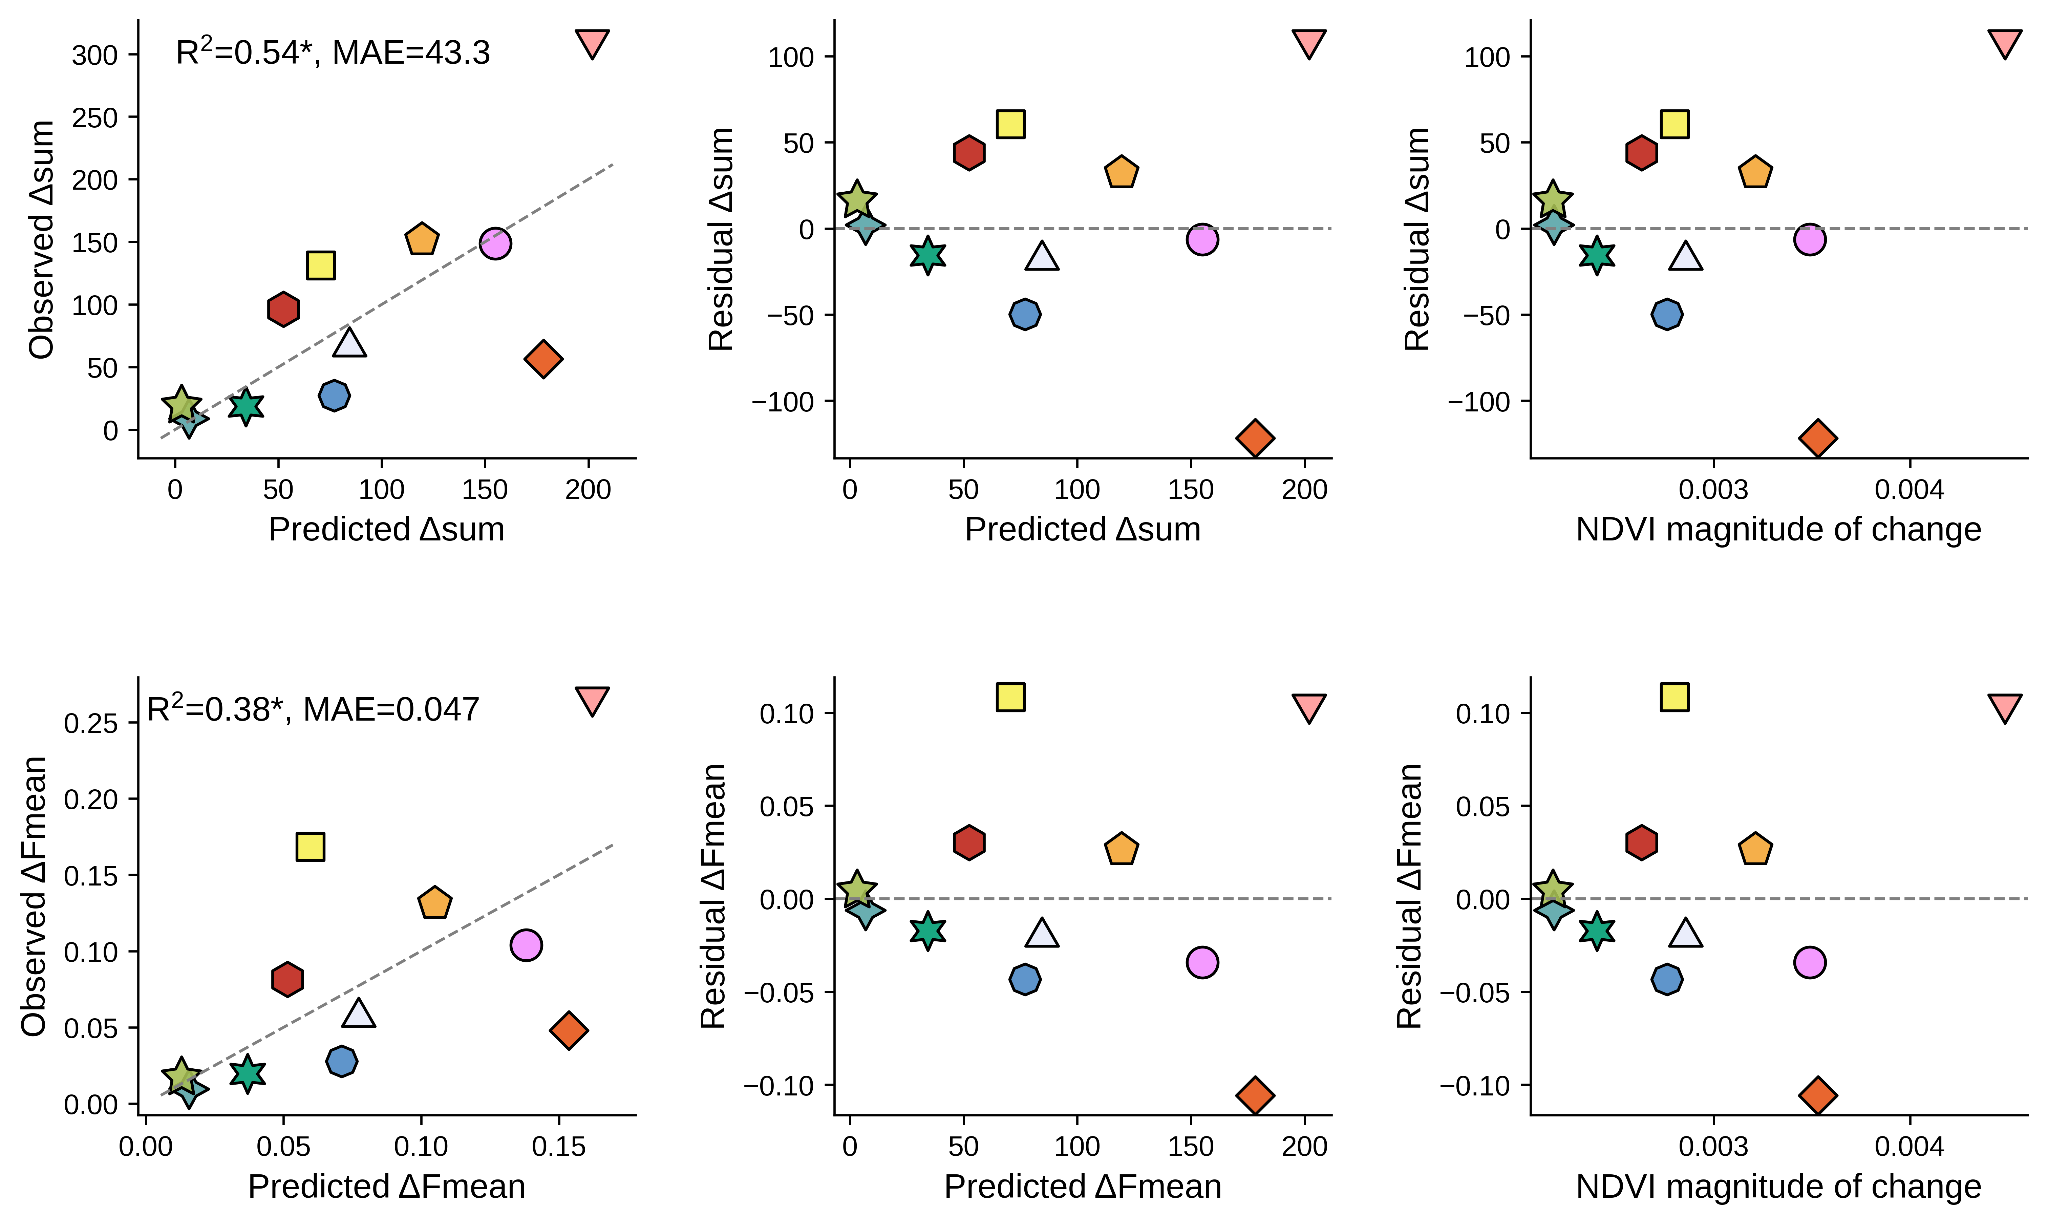
 Supplementary fig. 14. Predictions of genomic erosion.

Linear regressions between predicted and observed accumulation of ROHs, and the distribution of residuals with regard to predicted values and NDVI magnitude of change (the predictor). Predictions for each population were generated using the jackknife procedure. A threshold of maximum three allowed heterozygous sites per ROH was used and a minimum ROH length of 500 kb was considered. The top row shows the predictions for Δsum while the bottom row for ΔFmean. The asterisk after the R squared value indicates p<0.05. MAE=Mean Absolute Error.


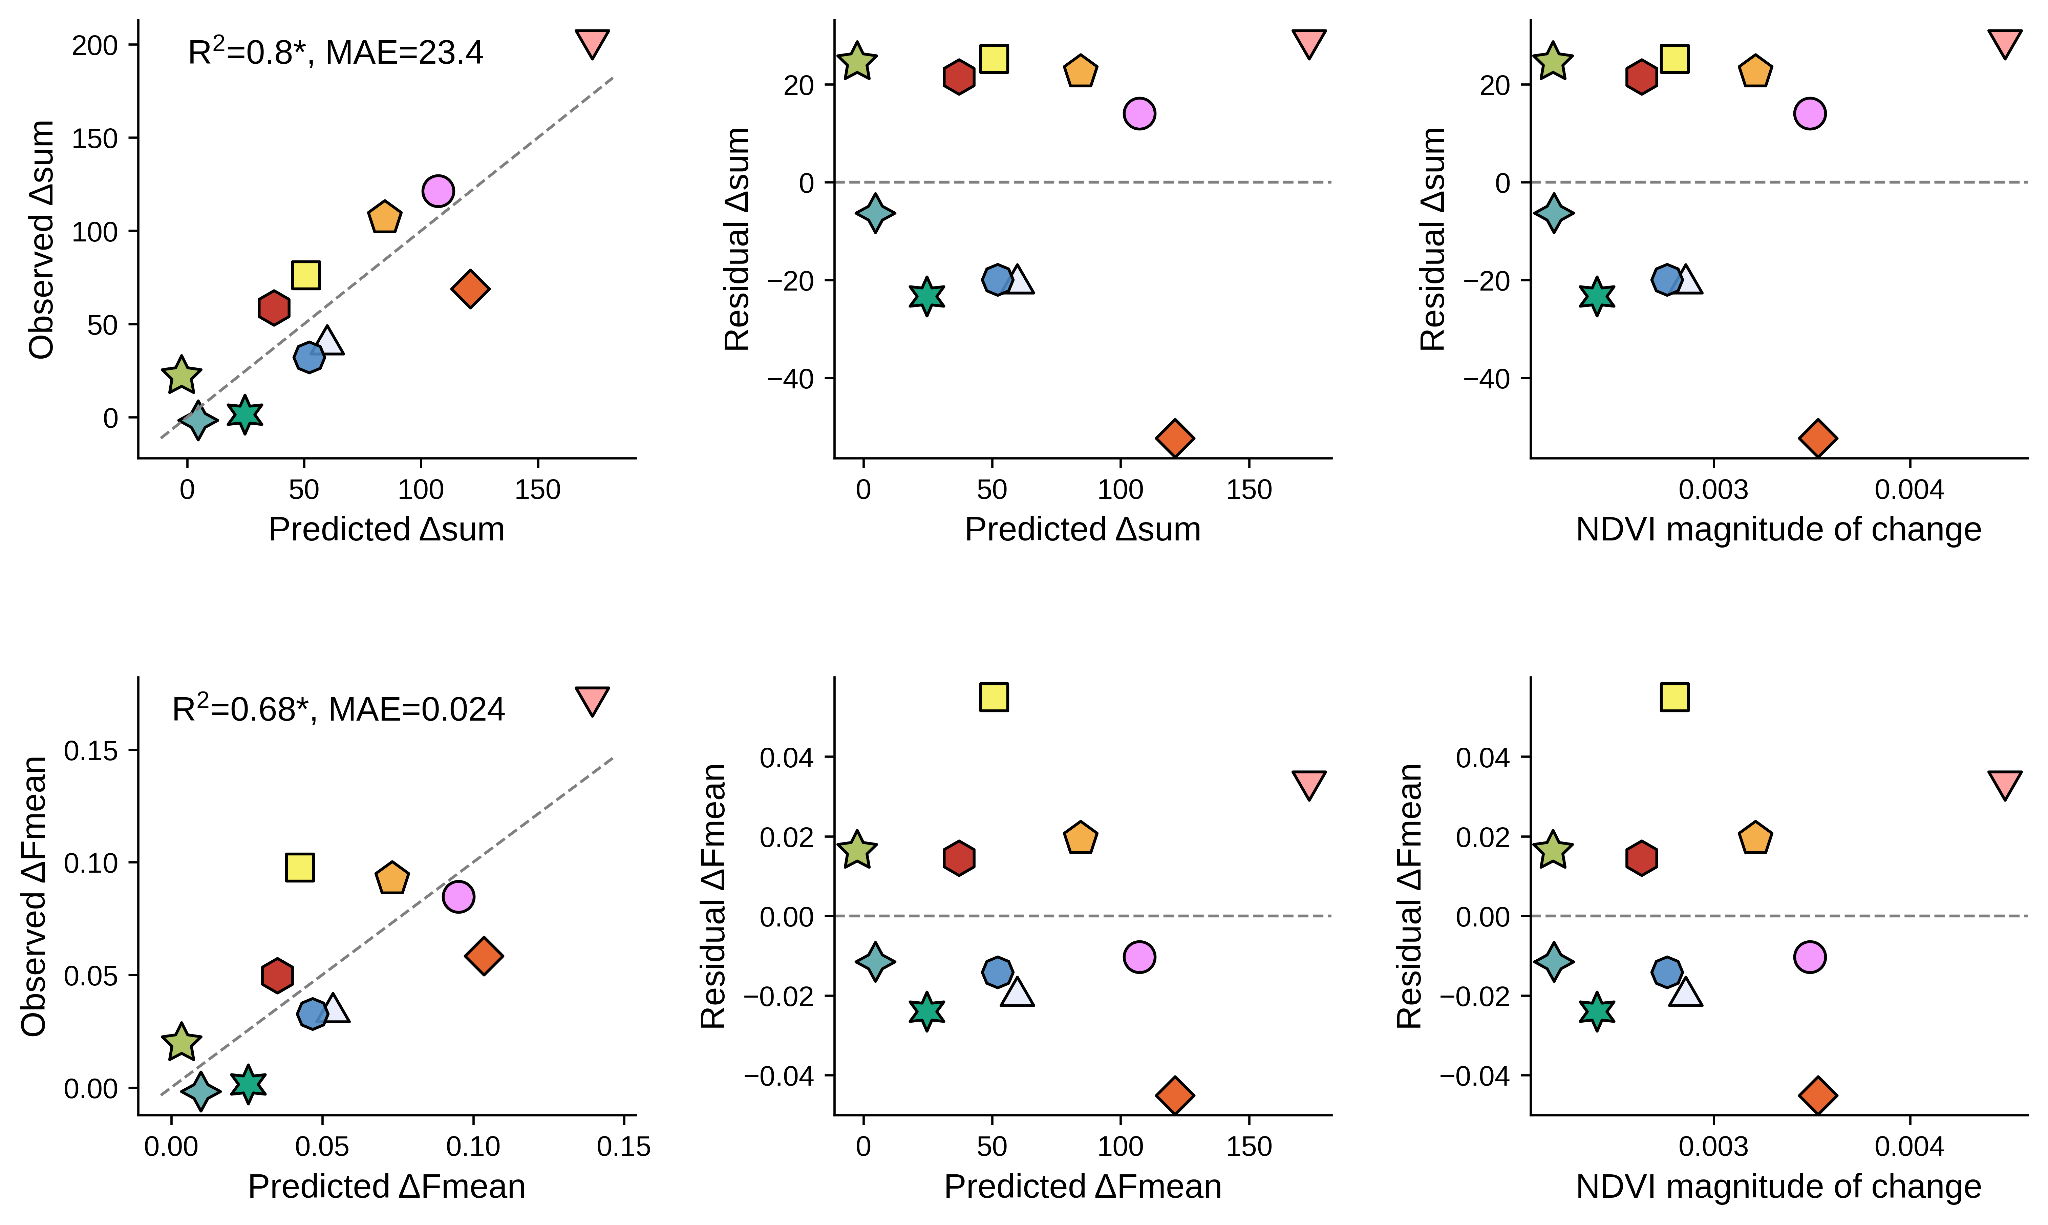
 Supplementary fig. 15. Predictions of genomic erosion.

Linear regressions between predicted and observed accumulation of ROHs, and the distribution of residuals with regard to predicted values and NDVI magnitude of change (the predictor). Predictions for each population were generated using the jackknife procedure. A threshold of maximum three allowed heterozygous sites per ROH was used and a minimum ROH length of 700 kb was considered. The top row shows the predictions for Δsum while the bottom row for ΔFmean. The asterisk after the R squared value indicates p<0.05. MAE=Mean Absolute Error.

Supplementary Table 1. Herbarium archive and modern sample information.

Individual codes and sequencing IDs in parentheses, collection date, and locality description (longitude and latitudes for modern samples) are provided for each mountain. Herbaria codes: ATH (Goulandris Natural History Museum), CP (University of Copenhagen), LD (Lund University)

| **Archived samples** |  |  | **Modern samples** |  |  |  |  |
| --- | --- | --- | --- | --- | --- | --- | --- |
| **Herbarium code (Sequencing ID)** | **Collection date** | **Locality description** | **Code**  **(Sequencing ID)** | **Collection**  **date** | **Lon** | **Lat** | **Elevation** |
| ***S. scardica*** |  |  |  |  |  |  |  |
| **Menoikio** |  |  |  |  |  |  |  |
| ATH13037 (h49) | 19/6/1956 | From Grekika Kalivia to Karpa, 1900m | MEN16 (s49) | 12/8/2020 | 23.71566 | 41.16697 | 1842 |
| CP16153a (h50) | 20/7/1978 | Above Mikropolis, 1550-1850m | MEN44 (s50) | 26/4/2021 | 23.76713 | 41.19709 | 1671 |
| CP16153b (h51) | 20/7/1978 | Above Mikropolis, 1550-1850m | MEN46 (s51) | 26/4/2021 | 23.76646 | 41.19784 | 1711 |
| CP18619b (h52) | 5/7/1981 | NNE of the summit, by end of forest road ascending from the village of Mikropolis (14 km from the village), 1500-1600m, Grassy subalpine meadows. | MEN52 (s52) | 26/4/2021 | 23.76518 | 41.19582 | 1719 |
| CP18619c (h53) | 5/7/1981 | NNE of the summit, by end of forest road ascending from the village of Mikropolis (14 km from the village), 1500-1600m, Grassy subalpine meadows. | MEN54 (s53) | 26/4/2021 | 23.76593 | 41.19510 | 1672 |
| CP18619a (h63) | 5/7/1981 | NNE of the summit, by end of forest road ascending from the village of Mikropolis (14 km from the village), 1500-1600m, Grassy subalpine meadows. | MEN48 (s63) | 26/4/2021 | 23.76570 | 41.19791 | 1724 |
| **Pangaio** |  |  |  |  |  |  |  |
| ATH13034 (h44) | 30/8/1959 | Mati. 1830m | PAN03 (s44) | 14/6/2020 | 24.08935 | 40.91332 | 1921 |
| CP15328a (h45) | 28/7/1977 | Towards Trikorfo summit, 1600m, Alpine grasslands | PAN06 (s45) | 14/8/2020 | 24.08859 | 40.93816 | 1454 |
| CP15328b (h46) | 28/7/1977 | Towards Trikorfo summit, 1600m, Alpine grasslands | PAN15 (s46) | 14/8/2020 | 24.09072 | 40.93407 | 1608 |
| ATH42198a (h47) | 28/7/1977 | Trikorfos, 1600m | PAN25 (s47) | 14/8/2020 | 24.08883 | 40.92451 | 1860 |
| ATH42198b (h48) | 28/7/1977 | Trikorfos, 1600m | PAN27 (s48) | 14/8/2020 | 24.08237 | 40.92541 | 1740 |
| CP107a (h62) | 12/7/1977 | N part of the summit area, Place called Lofkes, 1600-1700m, Rocky alpine grassland | PAN28 (s62) | 14/8/2020 | 24.08633 | 40.93326 | 1515 |
| **Olympos** |  |  |  |  |  |  |  |
| ATH40754a (h36) | 28/7/1978 | N of the refuge "Spilios Agapitos". Apostolidis ravine, 2050-2150, sandy stony ground | OLY19 (s36) | 7/8/2020 | 22.37681 | 40.08224 | 1803 |
| ATH40754b (h37) | 28/7/1978 | N of the refuge "Spilios Agapitos". Apostolidis ravine, 2050-2150, sandy stony ground | OLY22 (s38) | 7/8/2020 | 22.37422 | 40.08211 | 1921 |
| ATH5776a (h38) | 1/8/1968 | E side of Mt. Olymbos, in ravine SE and below the refuge A "Spilios Agapitos", 2000-2100m, steep rocky slides, screes and gravel at the bottom of the ravine | OLY25 (s39) | 7/8/2020 | 22.37347 | 40.08285 | 1991 |
| ATH5777a (h39) | 1/8/1968 | E side of Mt. Olymbos, "Apostolidis" ravine, N of the refugeA "Spilios Agapitos", 2050-2150m, rocky slopes, screes and gravel at the bottom of the ravine | OLY26 (s40) | 7/8/2020 | 22.37289 | 40.08250 | 1997 |
| CP9408a (h41) | 17/8/1975 | Surroundings of Hellenic Alpine Club Refuge A, 2000-2150m, Pinus heldreichii woodland and limestone ravines | OLY27 (s41) | 7/8/2020 | 22.37247 | 40.08098 | 2025 |
| CP9408b (h42) | 17/8/1975 | Surroundings of Hellenic Alpine Club Refuge A, 2000-2150m, Pinus heldreichii woodland and limestone ravines | OLY28 (s42) | 7/8/2020 | 22.37221 | 40.08089 | 2040 |
| CP12328 (h43) | 5/8/1978 | E side, Mavrolongos valley between Prionia and Refuge A, 1600m, Open, rocky places in Pinus nigra/heldreichii woodland | OLY29 (s43) | 7/8/2020 | 22.37200 | 40.08081 | 2062 |
| ***S. raeseri*** |  |  |  |  |  |  |  |
| **Tymfi** |  |  |  |  |  |  |  |
| ATH5793 (h31) | 7/7/1979 | W part of Mt. Timfi (Gamila), around the EOS Katafigion 4 km ENE of the village "Mikron Papingon", 1850-1900m | TYM04 (s31) | 31/7/2020 | 20.75465 | 39.97616 | 1568 |
| ATH43546a (h32) | 7/7/1979 | N Pindhos, W part of Mt. Timfi (Gamila), 4-4,5 km ENE of the village "Mikron Papingon", N of the EOS Katafigion along the ridge to Koutsomitros summit, 1850-2000m, dry alpine pastures with rocky outcrops and E facingrocky slopes. | TYM09 (s32) | 31/7/2020 | 20.76759 | 39.97846 | 1900 |
| ATH43546b (h33) | 7/7/1979 | N Pindhos, W part of Mt. Timfi (Gamila), 4-4,5 km ENE of the village "Mikron Papingon", N of the EOS Katafigion along the ridge to Koutsomitros summit, 1850-2000m, dry alpine pastures with rocky outcrops and E facingrocky slopes. | TYM11 (s33) | 31/7/2020 | 20.76709 | 39.98079 | 1936 |
| ATH42114a (h34) | 23/7/1977 | Around refuge EOS, 1800m | TYM16 (s34) | 31/7/2020 | 20.76893 | 39.97990 | 1894 |
| ATH42114b (h61) | 23/7/1977 | Around refuge EOS, 1800m | TYM26 (s35) | 1/8/2020 | 20.77082 | 39.979428 | 1811 |
| CP15458 (h35) | 7/7/1979 | W part around the EOS katafygion, above the village of Mikro Papigon, 1900-2050, subalpine meadows and rocks | TYM24 (s61) | 1/8/2020 | 20.77201 | 39.97868 | 1784 |
| **Koziakas** |  |  |  |  |  |  |  |
| LD1462898 (h21) | 7/7/1972 | 5 km NE of Pertouli, rocky S slope, NW of the E.M.O.T. cabin, 1750-1900m | KOZ01 (s21) | 22/7/2020 | 21.52694 | 39.54616 | 1591 |
| LD1462658 (h22) | 7/7/1972 | 5 km NE of Pertouli, rocky S slope, NW of the E.M.O.T. cabin, 1750-1900m | KOZ04 (s22) | 22/7/2020 | 21.52674 | 39.54754 | 1609 |
| LD1463033 (h23) | 28/61971 | 11 km NW of Pili (near Elati), dry limestone cliffs, 1800m | KOZ08 (s23) | 22/7/2020 | 21.53623 | 39.54705 | 1863 |
| LD1426427 (h24) | 7/8/1974 | 6 km E of Pertoulion, dry W-slope slope with Juniperus and Eryngium, some rocks, 1750-1850m | KOZ13 (s24) | 22/7/2020 | 21.53519 | 39.54685 | 1854 |
| **Agrafa** |  |  |  |  |  |  |  |
| LD1463798 (h25) | 22/6/1971 | Mt Mazur, 3 km ESE of Argidea, W-facing slope with small cliffs, 1750-1800m | AGR07 (s25) | 24/7/2020 | 21.56210 | 39.30997 | 1985 |
| LD1426487 (h26) | 13/7/1974 | Mt Karava, 3 km NW of Vlasion, dry and grazed SE slope below the top, 2050-2150m | AGR12 (s26) | 24/7/2020 | 21.55218 | 39.31359 | 1891 |
| LD1463018 (h27) | 14/6/1971 | Mt Kazarma, 4 km NE of Vlasion, W-facing slope scree with small cliffs, 1800m | AGR16 (s27) | 25/7/2020 | 21.62585 | 39.31549 | 1792 |
| LD1462778 (h28) | 14/7/1974 | Mt. Kazarma, 4.5 km NNE of Vlasion, rocks and ledges facing NW, 1760m | AGR18 (s28) | 25/7/2020 | 21.62624 | 39.31873 | 1772 |
| LD1462838 (h29) | 15/7/1974 | Mt Voutsikaki, 4.5 km ESE of Vlasion, rocks and dry E-slope near the top, 2100m | AGR25 (s29) | 25/7/2020 | 21.63139 | 39.28009 | 2084 |
| LD1462718 (h30) | 15/7/1974 | Mt Voutsikaki, 4.5 km ESE of Vlasion, rocks and dry E-slope near the top, 2100m | AGR28 (s30) | 25/7/2020 | 21.63204 | 39.28072 | 2058 |
| **Giona** |  |  |  |  |  |  |  |
| ATH44501a (h16) | 12/8/1980 | NE of the summit, 2100-2200m, E facing scree and rocks | GIO25 (s16) | 11/7/2020 | 22.25662 | 38.64787 | 2295 |
| ATH44501b (h17) | 12/8/1980 | NE of the summit, 2100-2200m, E facing scree and rocks | GIO28 (s17) | 11/7/2020 | 22.25874 | 38.64927 | 2170 |
| CP918a (h18) | 12/8/1980 | NE of the summit, 2100-2200m, E facing scree and rocks | GIO29 (s18) | 11/7/2020 | 22.26000 | 38.64975 | 2095 |
| CP918c (h19) | 12/8/1980 | NE of the summit, 2100-2200m, E facing scree and rocks | GIO30 (s19) | 11/7/2020 | 22.26049 | 38.65026 | 2057 |
| CP918b (h20) | 12/8/1980 | NE of the summit, 2100-2200m, E facing scree and rocks | GIO31 (s20) | 11/7/2020 | 22.26074 | 38.65101 | 2027 |
| LD1426187 (h60) | 17/8/1973 | 3 km E of Sikea, small limestone cliffs and gravel facing E, 2425m | GIO24 (s60) | 11/7/2020 | 22.25276 | 38.64202 | 2385 |
| ***S. euboea*** |  |  |  |  |  |  |  |
| **Dirfys** |  |  |  |  |  |  |  |
| ATH46727 (h11) | 15/7/1980 | W-facing slope, 1500m | DIR20 (s12) | 18/7/2020 | 23.85761 | 38.62157 | 990 |
| ATH5788a (h12) | 28/9/1968 | Summit area of Mt. Dhirfis, from the EOS refuge 1150m up to the peak 1740m, open stony-rocky limestone slopes and dry meadows | DIR21 (s13) | 18/7/2020 | 23.85820 | 38.62211 | 978 |
| LD1497680 (h14) | 19/7/1966 | 6-7 km NE of the village of Steni (NE of Khalkis), rocks and rocky slope facing W, 930m | DIR23 (s14) | 18/7/2020 | 23.85097 | 38.61795 | 1158 |
| LD1497740 (h15) | 19/7/1966 | 6-7 km NE of the village of Steni (NE of Khalkis), rocks and rocky slope facing W, 930m | DIR26 (s15) | 18/7/2020 | 23.85225 | 38.61925 | 1157 |
| ATH5788c (h59) | 28/9/1968 | Summit area of Mt. Dhirfis, from the EOS refuge 1150m up to the peak 1740m, open stony-rocky limestone slopes and dry meadows | DIR24 (s59) | 18/7/2020 | 23.85161 | 38.61859 | 1137 |
| ***S. clandestina*** |  |  |  |  |  |  |  |
| **Aroania** |  |  |  |  |  |  |  |
| ATH46714a (h54) | 31/7/1980 | 3.5 km. SW of the village Zaroukla, on a N-S lined ridge, 1600-1700m, small cliffs, rocky or stony ground, W-facing slope | ARO02 (s54) | 13/7/2021 | 22.25267 | 37.93630 | 1540 |
| ATH46714b (h55) | 31/7/1980 | 3.5 km. SW of the village Zaroukla, on a N-S lined ridge, 1600-1700m, small cliffs, rocky or stony ground, W-facing slope | ARO06 (s55) | 13/7/2021 | 22.25310 | 37.93752 | 1565 |
| ATH46714c (h56) | 31/7/1980 | 3.5 km. SW of the village Zaroukla, on a N-S lined ridge, 1600-1700m, small cliffs, rocky or stony ground, W-facing slope | ARO16 (s56) | 13/7/2021 | 22.25200 | 37.94288 | 1639 |
| LD1120302 (h57) | 9/9/1970 | 3.5 km SW of Zarouchla. NE-facing ravine, 1480-1570m | ARO25 (s57) | 13/7/2021 | 22.24888 | 37.94702 | 1737 |
| LD1120842 (h58) | 2/8/1968 | 3.5 km SSW of Zaroukla, calcareous mountain ridge, cliffs and splinters, 1700-1800m | ARO38 (s58) | 13/7/2021 | 22.24722 | 37.94243 | 1766 |
| **Parnon** |  |  |  |  |  |  |  |
| ATH16571b (h6) | 5/7/1971 | S. of the plateau "Profitis Ilias", on woody slopes of Megali Tourla summit, 1500-1600m, Dry rocky limestone ground with Abies trees, on both sides of a big ravine | PRN87 (s6) | 5/6/2021 | 22.60916 | 37.26768 | 1525 |
| ATH23891 (h7) | 32/7/1971 | S. of the plateau "Profitis Ilias", on woody slopes of Megali Tourla summit, 1700-1900m | PRN92 (s7) | 5/6/2021 | 22.60947 | 37.27189 | 1620 |
| LD1101985 (h8) | 9/6/1969 | Megala Tourla, 3 km W of Kastanitsa, 1650m | PRN95 (s8) | 5/6/2021 | 22.60783 | 37.27545 | 1673 |
| LD1128625 (h9) | 6/9/1970 | Megala Tourla, 3.5 km W of Kastanitsa, slopes and ridge with stones and gravel, 1500-1550m | PRN110 (s9) | 5/6/2021 | 22.61058 | 37.28267 | 1732 |
| CP13306a (h10) | 13/7/1971 | Megali Tourla, 1700-1900m | PRN128 (s10) | 5/6/2021 | 22.60956 | 37.27857 | 1754 |
| **Taygetos** |  |  |  |  |  |  |  |
| ATH44482a (h1) | 19/7/1980 | 1 km NE of the summit of Prof. Elias, along the path from the refuge to the summit, 1800-2000m, stony grassland | TAY70 (s1) | 2/6/2021 | 22.36343 | 36.95421 | 1705 |
| ATH46699a (h2) | 19/7/1980 | 1 km NE of the summit of Prof. Elias, along the path from the refuge to the summit, 1800-2000m, stony grassland | TAY76 (s2) | 2/6/2021 | 22.36127 | 36.955819 | 1772 |
| CP631b (h3) | 19/7/1980 | 1 KM NE of the summit of Prof. Elias, along the path from refuge to the summit, 1800-2000m, stony grassland | TAY81 (s3) | 2/6/2021 | 22.36059 | 36.95835 | 1833 |
| LD1101865 (h4) | 2/7/1969 | 1.5 km SE of Prof. Elias, E-facing slope, 1620-1770m | TAY90 (s4) | 2/6/2021 | 22.35547 | 36.96020 | 2097 |
| LD1101767 (h5) | 13/9/1970 | 1 km NE of Profitis Elias, rocky NE-facing slopes, 1800-2130m | TAY101 (s5) | 2/6/2021 | 22.36661 | 36.95020 | 1584 |
| CP631a (h64) | 19/7/1980 | 1 KM NE of the summit of Prof. Elias, along the path from refuge to the summit, 1800-2000m, stony grassland | TAY83 (s64) | 2/6/2021 | 22.35940 | 36.95861 | 1872 |

Supplementary Table 2. Genome assembly steps.

After each step the total number of sequences, the total genome length, the N50 score, and BUSCO statistics are provided. The embryophyta_odb10 (1’614 genes) database was used for the estimation of completeness and duplication.

| **Genome assembly step** | **Number of sequences** | **Total length (Gb)** | **N50 (Mb)** | **Busco completeness and duplication (%)** |
| --- | --- | --- | --- | --- |
| CANU v2.2 | 4,346 | 1.268 | 0.99 | 98.8, 39.4 |
| Purge Haplotigs v1.1.2 | 2,287 | 1.151 | 1.33 | 98.8, 34.7 |
| Pseudohaploid | 1,601 | 1.073 | 1.55 | 98.7, 25.2 |
| SALSA v2.3 | 1,015 | 1’074 | 4.62 | 98.7, 25.3 |
| SSPACE-LongRead v1.1 | 879 | 1’074 | 4.98 | 98.7, 25.3 |
| SSPACE Standard v3.0 | 828 | 1’074 | 4.98 | 98.7, 25.3 |
| SALSA v2.3 | 800 | 1’074 | 6.5 | 98.7, 25.2 |
| SSPACE Standard v3.0 | 728 | 1’074 | 7.2 | 98.7, 25.3 |

Supplementary Table 3. Total number of called sites and number of retained SNPs across different missing genotype thresholds.

The total number of called sites represents the utilized genome size after the exclusion of repetitive regions and low-quality reads. The number of high-quality SNPs per population under different missing genotype thresholds per population is provided.

| **Population** | **All sites (utilized genome size)** | **Number of SNPs (10%)** | **Number of SNPs (15%)** | **Number of SNPs (20%)** |
| --- | --- | --- | --- | --- |
| Menoikio | 194,767,543 | 1,563,626 | 1,563,626 | 1,731,366 |
| Pangaio | 194,608,706 | 1,364,269 | 1,364,269 | 1,572,317 |
| Olympos | 204,551,260 | 2,015,080 | 2,275,944 | 2,275,944 |
| Tymfi | 192,534,721 | 1,578,030 | 1,578,030 | 1,800,988 |
| Koziakas | 194,856,321 | 1,288,370 | 1,634,459 | 1,634,459 |
| Agrafa | 196,252,777 | 2,378,546 | 2,378,546 | 2,543,772 |
| Giona | 196,827,550 | 2,183,521 | 2,183,521 | 2,402,402 |
| Dirfys | 197,297,379 | 1,832,571 | 1,832,571 | 2,008,126 |
| Aroania | 190,852,886 | 1,670,617 | 1,670,617 | 1,927,230 |
| Parnon | 188,693,001 | 1,690,179 | 1,690,179 | 1,865,642 |
| Taygetos | 186,388,176 | 1,992,306 | 1,992,306 | 2,146,364 |

Supplementary Table 4. Number of retrieved satellite images across populations and sensors.

The total number of images retrieved for the years 1984 to 2022 and for the months April to September.

| **Mountain** | **Landsat 4**  **LT04** | **Landsat 5**  **LT05** | **Landsat 7**  **LE07** | **Landsat 8**  **LC08** | **Landsat 9**  **LC09** |
| --- | --- | --- | --- | --- | --- |
| Menoikio | 16 | 712 | 617 | 329 | 34 |
| Pangaio | 9 | 561 | 485 | 220 | 22 |
| Olympos | 6 | 230 | 231 | 109 | 12 |
| Tymfi | 4 | 226 | 229 | 114 | 11 |
| Koziakas | 13 | 691 | 602 | 342 | 34 |
| Agrafa | 9 | 509 | 402 | 341 | 34 |
| Giona | 12 | 471 | 418 | 334 | 34 |
| Dirfys | 10 | 454 | 414 | 149 | 20 |
| Aroania | 10 | 702 | 629 | 333 | 35 |
| Parnon | 4 | 434 | 411 | 220 | 23 |
| Taygetos | 6 | 706 | 607 | 333 | 34 |

Supplementary Table 5. Correction parameters for harmonizing Landsat imagery across sensors.

Slope and intercept of the linear regression that was used to harmonize the Normalized Difference Vegetation Index (NDVI) between Landsat 4,5,7,8, and 9 satellite sensors across mountains.

|  | **Landsat 4 & 5 to Landsat 7** | | **Landsat 8 and 9 to Landsat 7** | |
| --- | --- | --- | --- | --- |
| **Mountain** | **Intercept** | **Slope** | **Intercept** | **Slope** |
| Menoikio | 0.018 | 0.99 | -0.053 | 1.016 |
| Pangaio | 0.209 | 0.601 | -0.018 | 0.949 |
| Olympos | 0.055 | 0.929 | -0.022 | 0.984 |
| Tymfi | 0.023 | 1.011 | -0.006 | 0.956 |
| Koziakas | 0.065 | 0.929 | -0.018 | 0.979 |
| Agrafa | 0.032 | 0.974 | -0.026 | 0.985 |
| Giona | 0.044 | 0.958 | -0.022 | 0.979 |
| Dirfys | 0.045 | 0.961 | -0.015 | 0.947 |
| Aroania | 0.034 | 0.989 | -0.025 | 0.981 |
| Parnon | 0.03 | 1 | -0.018 | 0.97 |
| Taygetos | 0.059 | 0.95 | -0.028 | 0.994 |

Supplementary Table 6. Jackknife estimates of model parameters.

The bias-corrected intercept (*a*) and slope (*b*) were estimated for three different thresholds of maximum allowed heterozygous sites for ROH calculation.

|  | **ROHs > 500Kb** | | | | **ROHs > 700Kb** | | | |
| --- | --- | --- | --- | --- | --- | --- | --- | --- |
|  | **Δsum** | | **ΔFmean** | | **Δsum** | | **ΔFmean** | |
| **Allowed**  **heterozygosity** |  |  |  |  |  |  |  |  |
| 1 | -142.91 | 63,403 | -0.12 | 52.7 | -78.35 | 34,032.2 | -0.06 | 28.4 |
| 2 | -209.78 | 94,925.5 | -0.17 | 78.9 | -119.4 | 55,299.9 | -0.1 | 45.9 |
| 3 | -282.97 | 128,947.1 | -0.23 | 106.9 | -185.83 | 85,553.1 | -0.15 | 71.3 |
